## 22 **ABSTRACT**

23 Visual motion discrimination involves reciprocal interactions in the alpha band between the  
24 primary visual cortex (V1) and the mediotemporal area (V5/MT). We investigated whether  
25 modulating alpha phase synchronization using individualized multisite transcranial  
26 alternating current stimulation (tACS) over V5 and V1 regions would improve motion  
27 discrimination. We tested 3 groups of healthy subjects: 1) an individualized In-Phase V1<sub>alpha</sub>-  
28 V5<sub>alpha</sub> tACS (0° lag) group, 2) an individualized Anti-Phase V1<sub>alpha</sub>-V5<sub>alpha</sub> tACS (180° lag)  
29 group and 3) a sham tACS group. Motion discrimination and EEG activity were compared  
30 before, during and after tACS. Performance significantly improved in the Anti-Phase group  
31 compared to that in the In-Phase group at 10 and 30 minutes after stimulation. This result  
32 could be explained by changes in bottom-up alpha-V1 gamma-V5 phase-amplitude  
33 coupling. Thus, Anti-Phase V1<sub>alpha</sub>-V5<sub>alpha</sub> tACS might impose an optimal phase lag between  
34 stimulation sites due to the inherent speed of wave propagation, hereby supporting  
35 optimized neuronal communication.

## 36 **IMPACT STATEMENT:**

- 37 • Alpha multisite (V1 and V5) tACS influences global motion discrimination and  
38 integration
- 39 • Phase-amplitude coupling is associated with visual performance
- 40 • Multisite Anti-Phase stimulation of strategic visual areas (V1 and V5) is associated  
41 with connectivity changes in the visual cortex and thus, associated with changes in  
42 direction acuity

43 **Key words:** visual processing, motion discrimination, oscillatory synchronization,  
44 noninvasive brain stimulation, multisite tACS, phase-amplitude coupling

45

## 46 INTRODUCTION

47

48 Motion direction discrimination training appears to be highly specific to the trained direction  
49 (Ball and Sekuler, 1987; Jia and Li, 2017) leading to the assumption that concurrent plastic  
50 changes may occur in early visual areas that are retinotopically organized and selective to  
51 basic visual features (Jehee et al., 2012; Karni and Sagi, 1991; Shibata et al., 2012).  
52 However, subsequent learning of a new direction is faster (Liu and Weinshall, 2000),  
53 suggesting the involvement of some higher-level processes. Furthermore, the manipulation  
54 of higher cognitive control processes, such as endogenous covert attention or exogenous  
55 spatial attention, improves stimuli location transfer and visual perceptual learning transfer to  
56 untrained stimulus location and features, respectively (Donovan et al., 2020; Donovan and  
57 Carrasco, 2018). Visual improvements would then rely on the interaction between multiple  
58 cortical areas (Gilbert et al., 2001), the combination of local intrinsic circuits and feedback  
59 connections from higher order cortical areas (Doshier and Lu, 1998; Gilbert and Sigman,  
60 2007).

61

62 Specifically, research in humans (Blakemore and Campbell, 1969) and primates  
63 (Simoncelli and Heeger, 1998) has established that the primary visual cortex (V1) and  
64 medio-temporal areas (MT/V5, labeled henceforth as V5) are co-activated in complementary  
65 feedforward and feedback sweeps (Lamme and Roelfsema, 2000; Newsome and Pare,  
66 1988), independent activation of these regions has been reported as well (Rodman et al.,  
67 1990). Their inter-dependency is related to the characteristics of the stimulus (e.g.,  
68 orientation) and to the anatomical pathways that are recruited. Moreover, this channel is  
69 endowed with specific patterning of electrical signals in response to visuo-attentional  
70 perception, motion discrimination and memory encoding (Alagapan et al., 2019a; Polanía et

71 al., 2012; Sauseng et al., 2009). In addition, evidence suggests that communication between  
72 these two regions in particular, may be established by phase synchronization of oscillations  
73 at lower frequencies (i.e., at Alpha-Beta frequencies, <25 Hz), acting as a temporal  
74 reference frame for information conveyed by high-frequency activity (at Gamma  
75 frequencies >40 Hz) (Bastos et al., 2015; Bonnefond et al., 2017; Fries, 2009; Seymour et  
76 al., 2019).

77

78 Phase synchronization is a key neuronal mechanism that drives spontaneous  
79 communication among dynamical nodes (Gollo et al., 2014), implying that this mechanism  
80 supports attentional, executive, and contextual functions (Doesburg et al., 2009;  
81 Freunberger et al., 2007; Palva and Palva, 2011). The two simplest phase synchronization  
82 patterns are *in-phase synchronization* (i.e., zero phase lag between the two regions) and  
83 *anti-phase synchronization* (i.e., 180° phase lag between the two regions). In-Phase  
84 synchronization between two distant neuronal populations is thought to subserve the  
85 integration of separated functions that are performed in these different regions (Engel et al.,  
86 1991; Roelfsema et al., 1997; Wang et al., 2010). Conversely, anti-phase patterns reflect  
87 more dynamical reciprocity, where certain areas of the brain increase their activity while  
88 others decrease their own activity. Such anti-phase patterns have been reported during  
89 sleep (Horovitz et al., 2009), or during visual attentional tasks (Yaple and Vakhrushev,  
90 2018). It has been proposed that these anti-phase oscillation patterns reflect time-delays in  
91 functional coupling between two connected regions (Petkoski and Jirsa, 2019). Since  
92 communication between neurons is achieved by propagation of action potentials throughout  
93 axons, with conduction times defined by some regional specificities, such as myelination  
94 density, number of synaptic relays, inhibitory couplings etc., an optimal phase delay

95 relationship between two interconnected regions could be a key driver of brain  
96 communication.

97

98 In this article, we set out to determine whether motion discrimination performance can be  
99 enhanced when ‘artificially’ entraining/manipulating the phase relationship between V1 and  
100 V5. This is based on the idea that inter-areal synchronization plays a significant role in V1-  
101 V5 communication, as demonstrated previously (Lewis et al., 2016; Siegel et al., 2008). We  
102 used individually adjusted, Alpha transcranial alternating current stimulation (tACS) to  
103 entrain endogenous oscillations (Helfrich et al., 2014) and enhance inter-areal information  
104 flow (Zhang et al., 2019). The modulation consisted in applying approximately 15 minutes  
105 of concurrent, bifocal (over V1 and V5), individualized Alpha-tACS. We assessed two  
106 conditions of stimulation: In-Phase (zero phase lag) stimulation and Anti-Phase stimulation  
107 ( $180^\circ$  phase lag). This was done to contrast the behavioral consequences of these two  
108 different phase delays (Klimesch et al., 2007). A Sham tACS group was evaluated to control  
109 for non-specific, placebo-like effects .

110

111 Furthermore, the entire experiment was conducted while recording multi-channel  
112 electroencephalography (EEG). Electrophysiological analyses were computed with the  
113 objective of determining EEG markers of interareal modulation between the two target  
114 areas. We paid special attention to connectivity metrics in the Alpha band, as well as in the  
115 Gamma band because of their role in visual features binding (Elliott and Müller, 1998; Gray  
116 and Singer, 1989; Zhang et al., 2019). In fact, the interactions between Alpha and Gamma  
117 oscillations may serve as a framework supporting the feedforward and feedback loops of  
118 inter-regional brain communication within the visual system (Kerkoerle et al., 2014;  
119 Michalareas et al., 2016). Specifically, top-down Alpha appears to control the timing and

120 elicitation of higher frequency rhythms, thus optimizing communication in the visual cortex  
121 (Fries, 2015; Michalareas et al., 2016). Taken together, we hypothesize that the best inter-  
122 areal Alpha phase relationship for optimal oscillatory entrainment leading to respective  
123 behavioral enhancement is associated with changes in Alpha-Gamma coupling.

## 124 **RESULTS**

125

126 All participants tolerated the stimulation well and did not report any adverse effects such as  
127 peripheral sensory or phosphene perception. Five participants could not be included in the  
128 analyses: One participant discontinued the experiment without stating the reason for it and  
129 four participants were discarded, because they failed to perform the task properly.  
130 Therefore, 45 full sets of data were analyzed, forming homogenous groups of 15  
131 participants. For the EEG metrics of interest (ZPAC), three data points (i.e., 2 from the In-  
132 Phase group, 1 from the Anti-Phase group) were found by Cook's Distance algorithm (Cook,  
133 1977) to be more than two standard deviations from the mean of the distribution, and were  
134 thus not included in the analyses.

135

### 136 **Motion direction performance throughout groups and time**

137 Figure 2A displays the mean baseline-corrected NDR thresholds across participants,  
138 reflecting the normalized motion direction value corresponding to 75% correct performance  
139 (see Method section) across groups and time. Although there was no statistically significant  
140 difference between groups at baseline (Anti Phase vs. In Phase  $b = 1.670$ ,  $P = 0.809$ ,  $CI =$   
141  $-11.835$   $15.175$ , Sham vs. In Phase  $b = 3.260$ ,  $P = 0.624$ ,  $CI = -9.770$   $16.290$ , Sham vs Anti  
142 Phase  $b = 1.590$ ,  $P = 0.815$ ,  $CI = -11.696$   $14.876$ ; see also Supplementary Table 1 providing  
143 the raw NDR values), the baseline values showed a large variability, therefore we applied a  
144 baseline correction procedure to account for this variability . When considering all the groups  
145 together, the change in baseline-corrected NDR was not significant between TP0 and TP10  
146 ( $b = -0.05$ ,  $P = 0.189$ ,  $CI = -0.124$   $0.024$ ) nor between TP0 and TP30 ( $b = -0.067$ ,  $P = 0.079$ ,  
147  $CI = -0.141$   $0.008$ ), neither between TP10 and TP30 ( $b = -0.017$ ,  $P = 0.657$ ,  $CI = -0.091$   
148  $0.057$ ). However, there was a significant difference at TP0, TP10 and TP30 between the In-

149 Phase and the Anti-Phase group ( $b = 0.257$ ,  $P = 0.015$ ,  $CI = 0.05$  0.464). There was no  
150 difference for other group comparisons for all time points ( $b = 0.16$ ,  $P = 0.118$ ,  $CI = -0.04$   
151 0.36 Sham and In-Phase;  $b = -0.097$ ,  $P = 0.349$ ,  $CI = -0.301$  0.107 Sham and Anti-Phase).

152 For the Anti-Phase group the changes in the NDR were not significant between  
153 Baseline and TP0 ( $b=-2.865$ ,  $P=0.31$ ,  $CI=-8.401$  2.671), however they were strongly  
154 significant between Baseline and TP10 ( $b=-9.655$ ,  $P=0.001$ ,  $CI=-15.19$  -4.119) and between  
155 Baseline and TP30 ( $b=-14.519$ ,  $P=0.001$ ,  $CI=-20.054$  -8.983). Moreover, NDR was  
156 significant between TP0 and TP10 ( $b=-6.79$ ,  $P=0.016$ ,  $CI=-12.325$  -1.254), and between  
157 TP0 and TP30 ( $b=-11.653$ ,  $P>0$ ,  $CI=-17.189$  -6.118), although not significant between TP10  
158 and TP30 ( $b=-4.864$ ,  $P=0.085$ ,  $CI=-10.4$ , 0.672).

159 For the In-Phase group the changes in the NDR were not significant between  
160 Baseline and TP0 ( $b=0.23$ ,  $P=0.93$ ,  $CI=-4.881$  5.342), nor between Baseline and TP10 ( $b=-$   
161 2.309  $P=0.376$ ,  $CI=-7.42$  2.802) neither between Baseline and TP30 ( $b=-0.291$ ,  $P=0.911$ ,  
162  $CI=-5.403$  4.82). Moreover, NDR was not significant between TP0 and TP10 ( $b=-2.539$ ,  
163  $P=0.33$ ,  $CI=-7.65$ , 2.572), nor between TP0 and TP30 ( $b=-0.522$ ,  $P=0.841$ ,  $CI=-5.633$  4.59),  
164 neither between TP10 and TP30 ( $b=2.017$ ,  $P=0.439$ ,  $CI=-3.094$ , 7.129).

165 For the Sham group the changes in the NDR were marginally significant between  
166 Baseline and TP0 ( $b=-5.802$ ,  $P=0.04$ ,  $CI=-11.339$  -0.265) and between Baseline and TP30  
167 ( $b=-6.311$ ,  $P=0.025$ ,  $CI=-11.849$  -0.774), but not significant between Baseline and TP10 ( $b=-$   
168 4.577  $P=0.105$ ,  $CI=-10.114$  0.96). Moreover, NDR was not significant between TP0 and  
169 TP10 ( $b=1.225$ ,  $P=0.665$ ,  $CI=-4.312$  6.762), nor between TP0 and TP30 ( $b=-0.509$ ,  
170  $P=0.857$ ,  $CI=-6.047$  5.028), neither between TP10 and TP30 ( $b=-1.734$ ,  $P=0.539$ ,  $CI=-7.272$   
171 3.803).

172

173



174 - Please insert Figure 2 approximately here –

175

## 176 EEG Results

177 In all participants, the visual discrimination task led to an amplitude increase in the  
178 Theta/Low Alpha band, right after the onset of the stimulus, followed by a phasic decrease  
179 in power in the High Alpha/Low Beta bands ~200 ms thereafter (**Figure 2B**). Additionally, in  
180 frequencies above 30 Hz, there was a constant decrease in magnitude during stimulus  
181 presentation, as previously described in the literature for this type of visual task (e.g., (Siegel  
182 et al., 2007; Townsend et al., 2017)).

183 The Lasso model, defined for each time point, showed that a single EEG marker,  
184 namely ZPAC-V1<sub>pAlpha</sub>V5<sub>aGamma</sub> had the largest explanatory value for the variance of NDR  
185 at TP10 ( $R^2=0.057$ ,  $\lambda=0.114$ ) and TP30 ( $R^2=0.082$   $\lambda=0.052$ ), irrespective of the stimulation  
186 group.

187 Since the ZPAC-V1<sub>pAlpha</sub>V5<sub>aGamma</sub> values best explained changes in the performance  
188 after stimulation, the rest of the manuscript focuses on this metric in order to further explore  
189 stimulation and time effects. The opposite direction, ZPAC-V1<sub>aGamma</sub>V5<sub>pAlpha</sub> was used as a  
190 control analysis to test for the directional specificity of the present results.

191

## 192 Changes in bottom-up V1 Alpha phase (V1<sub>pAlpha</sub>) - V5 Gamma amplitude (V5<sub>aGamma</sub>) 193 coupling

194 **Figure 3A** shows the mean baseline-corrected ZPAC-V1<sub>pAlpha</sub>V5<sub>aGamma</sub> values for the three  
195 groups across time. These values were extracted from the significant modulation of interest  
196 between the Alpha/High Theta and the Low Gamma bands shown in Figure 3B. It reveals a  
197 significant diminishment in the Alpha/High Theta (5-12 Hz) – Low Gamma (30-42 Hz) phase  
198 amplitude coupling at TP10 for the Anti-Phase and the Sham group and a significant



223 **Changes in top-down V1 Gamma amplitude ( $V1a_{\text{Gamma}}$ ) - V5 Alpha phase ( $V5p_{\text{Alpha}}$ )**  
224 **coupling**

225 To test the eventual directional specificity of the present results, we examined the opposite  
226 phase-amplitude coupling between V1 and V5. **Figure 4A** provides the descriptive data for  
227 the ZPAC- $V1a_{\text{Gamma}}V5p_{\text{Alpha}}$  for all 3 experimental groups over time. To statistically analyze  
228 these data, we applied a comparable approach as in the previous section. **Figure 4B** shows  
229 the results for the ZPAC- $V1a_{\text{Gamma}}V5p_{\text{Alpha}}$ , which appeared to have a significant  
230 Alpha/Theta – Low Gamma phase amplitude cluster at both TP10 and TP30. Diminished  
231 coupling is evident for the three stimulation groups when V5 Alpha/ High Theta (6-10 Hz)  
232 modulated Low V1 Low Gamma (30–37 Hz) amplitude. We then built a similar mixed linear  
233 model using the ZPAC- $V1a_{\text{Gamma}}V5p_{\text{Alpha}}$  values. These analyses showed no significant  
234 change in time between TP10 and TP30 ( $b = 0.409$ ,  $P = 0.286$ ,  $CI = -0.343, 1.161$ ). Neither  
235 at TP10 nor at TP30 was a significant difference between the Anti-Phase and Sham group  
236 ( $b = -0.718$ ,  $P = 0.484$ ,  $CI = -2.727, 1.292$ ), between the Anti-Phase and In-Phase group ( $b =$   
237  $0.695$ ,  $P = 0.506$ ,  $CI = -1.353, 2.744$ ) or between the In-Phase and Sham group ( $b = -$   
238  $1.413$ ,  $P = 0.161$ ,  $CI = -3.39, 0.564$ ). Unsurprisingly, when ZPAC- $V1a_{\text{Gamma}}V5p_{\text{Alpha}}$  was  
239 entered as a confounder into the NDR model, it did not significantly account for the variance  
240 in NDR scores for all the stimulation groups together at all time points ( $b = -0.007$ ,  $P = 0.53$ ,  
241  $CI = -0.029, 0.015$ ). Additionally, there was an absence of a significant interaction between  
242 ZPAC- $V1a_{\text{Gamma}}V5p_{\text{Alpha}}$  and each stimulation group, suggesting that the ZPAC-  
243  $V1a_{\text{Gamma}}V5p_{\text{Alpha}}$  group values did not explain the group differences in the NDR values at  
244 all timepoints (In-Phase vs. Anti-Phase:  $b = -0.055$ ,  $P = 0.432$ ,  $CI = -0.191, 0.082$ , In-Phase  
245 vs. Sham:  $b = 0.006$ ,  $P = 0.908$ ,  $CI = -0.09, 0.101$ , Anti-Phase vs. Sham:  $b = 0.06$ ,  $P = 0.234$ ,  
246  $CI = -0.039, 0.16$ ) (all other comparisons are shown in the Supplementary Table 3).

247

248

249

*- Please insert Figure 4 approximately here -*

250

## 251 **DISCUSSION**

252 By applying multisite tACS in the Alpha range to V1 and V5 with a phase difference of 180  
253 degrees (Anti-Phase) during a visual global motion direction discrimination and integration  
254 task, we were able to modulate interactions between V1 and V5 functionally-relevant  
255 resulting in significant behavioral improvement. For instance, this led to a significant  
256 enhancement of motion discrimination and integration in the young healthy individuals.  
257 Specifically, the behavioral improvement was associated with a modulation of inter-regional  
258 oscillatory coupling between the two stimulated brain areas. The three main findings can be  
259 summarized as follows: 1) *Anti-Phase*  $V1_{\text{Alpha}}-V5_{\text{Alpha}}$  tACS entrainment leads to an  
260 improvement in visual performance during and shortly after stimulation compared to *In-*  
261 *Phase*  $V1_{\text{Alpha}}-V5_{\text{Alpha}}$ , which appears rather detrimental to motion discrimination and  
262 integration, 2) improved performance with *Anti-Phase*  $V1_{\text{Alpha}}-V5_{\text{Alpha}}$  tACS can best be  
263 explained by changes in bottom-up V1 Alpha phase - V5 Gamma amplitude coupling ( $ZPAC-$   
264  $V1p_{\text{Alpha}}V5a_{\text{Gamma}}$ ), and 3) the opposite, top-down modulation ( $ZPAC-V5p_{\text{Alpha}}V1a_{\text{Gamma}}$ ) did  
265 not influence performance in the current paradigm.

266

### 267 **In-Phase $V1_{\text{Alpha}}-V5_{\text{Alpha}}$ stimulation hampers motion discrimination and integration**

268 In-Phase tACS between two distant regions is motivated by the idea of increasing  
269 interregional synchronization and connectivity within a network (Polanía et al., 2012; Schwab  
270 et al., 2019; Vieira et al., 2020), under the hypothesis that a reduced phase-lag ( $\sim 0^\circ$ ) between  
271 sites would promote an optimal inter-areal coupling and thus, optimal communication (e.g.,  
272 (Fries, 2005)). There is empirical evidence supporting this hypothesis. For instance, In-  
273 Phase stimulation has been associated with increased performance in visuo-attentional and  
274 memory tasks (Alagapan et al., 2019b; Polanía et al., 2012; Violante et al., 2017), together with  
275 increased phase synchronization in the stimulated frequency band. In contrast to these data

276 however, the present results showed opposite effects, i.e. the In-Phase condition rather  
277 impaired visual discrimination capacity during the stimulation period of  $\sim 13 \pm 2$  minutes, and  
278 performance did not improve, but rather decreased 10 and even 30 minutes after applying  
279 it.

280 Visual discrimination is associated with local Alpha desynchronization right after  
281 stimulus presentation (Dijk et al., 2008; Erickson et al., 2019; Hillyard et al., 1998; Sauseng  
282 et al., 2009; Zammit et al., 2018). Subsequently, it has been shown in several perceptual  
283 experimental modalities that a decrease in the Alpha-Beta band is linked to better stimulus  
284 perception (Griffiths et al., 2019). Thus, a high amplitude and zero-phase lag condition might  
285 not be optimal in this case because, as shown in the present data, an increased V1 Alpha  
286 phase - V5 Gamma amplitude coupling post stimulation is rather associated with poor  
287 performance. It might be an intricated orchestration of oscillatory signatures that travels  
288 throughout the clusters of the neural network, controlled by stimuli properties (Muller et al.,  
289 2018). This oscillatory orchestration could be modeled as a multi-level interacting dynamical  
290 system (Alexander et al., 2019). Ultimately, cognition relies on feedback and feedforward  
291 dynamics, and these processes are only possible through complex, well-orchestrated phase  
292 and amplitude interactions (Siegel et al., 2012).

293 From a more integrative perspective, the inhibition timing hypothesis (Klimesch,  
294 2012) states that the optimal electrophysiological scenario that promotes perception relies  
295 on an inter-regional interplay of Alpha inhibition and Alpha disinhibition among areas  
296 belonging to the same network, as shown in the visual cortex (Shen et al., 2011). When this  
297 precise timing of activation/deactivation is disrupted by enforced Alpha In-Phase rhythms, it  
298 might generate a subsequent flood of massively synchronized signals, creating an artificial  
299 source of noise that may prevent accurate perception of stimulus features (Faisal et al.,  
300 2008; Voytek and Knight, 2015). Hence, the neuronal oscillatory system might require some

301 time to come back to its basal processing state, just as demonstrated for the overall  
302 performance at 10 min and 30 min after stimulation. Additionally, although the noise created  
303 by the In-Phase synchronization could be beneficial under some stochastic resonance  
304 phenomena (Wiesenfeld and Moss, 1995), because of its randomness nature, it harms the  
305 idea of an ordered, well-defined oscillatory gating process. This gating process ought to  
306 include specific frequency signatures between network pathways and clear time-space  
307 streams of activity (Jensen et al., 2014; Richter et al., 2017), instead of an equal probability  
308 of appearance of several frequency components across time without following a master  
309 order, characteristic of stochastic circumstances.

310 Furthermore, one could expect an energy optimization over time of the Alpha  
311 oscillations in the visual cortex under the Hamiltonian premise of minimum action in  
312 electrically charged natural systems (Aitchison and Lengyel, 2016; Seung et al., 1998). The  
313 lower the energy, the less prominent the power trace is, resulting in turn, into a weaker  
314 synchronization between the two signals. In other words, a fewer demand of resources and  
315 a less complex gating operation tends to a more prominent oscillatory desynchronization  
316 trace (Bays et al., 2015).

317 In conclusion, positive behavioral effects are not necessarily associated with an In-  
318 Phase synchronized magnification of the Alpha occipital rhythms in a visual discrimination  
319 task, but rather an ordered gating of oscillations and patterns as the Anti-Phase condition  
320 promotes.

321

322 **Anti-Phase V1<sub>Alpha</sub>-V5<sub>Alpha</sub> stimulation enhances motion discrimination and**  
323 **integration**

324 The improved offline performance reported in the present study is in accordance with a body  
325 of literature showing that inter-areal Anti-Phase stimulation might boost behavior in several

326 contexts. For instance, Beta band Anti-Phase bi-hemispheric stimulation has been shown  
327 to increase visual attentional capacity (Yaple and Vakhrushev, 2018). In the same vein,  
328 Theta band Anti-Phase stimulation over the prefrontal and perisylvian area has been found  
329 to improve controlled memory retrieval (Marko et al., 2019), while Gamma band Anti-Phase  
330 stimulation between the cerebellum and M1 enhances visuomotor control (Miyaguchi et al.,  
331 2019). Here, we found that Anti-Phase V1<sub>Alpha</sub>-V5<sub>Alpha</sub> tACS applied on average for 13±2  
332 minutes during a motion discrimination task significantly boosted motion direction  
333 discrimination and integration 10 minutes after the end of the stimulation and the effects  
334 continued to strengthen even 30 minutes later.

335 While any after-effects of tACS are under debate in the field (Strüber et al., 2015), we think  
336 that the improved performance measured in the Anti-Phase group, which persists over time,  
337 are not simply explained by an offline effect of the stimulation per se. Instead, we argue that  
338 it is the repeated practice of the task combined with the Anti-Phase tACS condition that  
339 promotes a “learning-like after-effect”. These after-effects might indeed find a justification in  
340 the accumulation of offline effects that lead to a carry-over of the achieved behavioral  
341 improvement (Heise et al., 2019) and might generate favorable plastic changes in the visual  
342 cortex due to the learning associated with the task, as it has been shown in non-human  
343 primates (Yang and Maunsell, 2004).

344 The biophysical mechanisms underlying the behavioural improvement, as well as its relative  
345 timing are still unclear. One can speculate that Alpha oscillatory traces should be considered  
346 as traveling flows of electrical activity around the specific neuronal network (Alamia and  
347 VanRullen, 2019; Lozano-Soldevilla and VanRullen, 2019), instead of simple mono-focal  
348 fluctuating rhythms. Under this premise, at really specific timings, these waves are used to  
349 either start or stop inhibition inter-regionally with the objective of pursuing an optimal



350 transmission of stimulus information, and more importantly, a sustained perceptual learning  
351 (Sigala et al., 2014).

352

353 Alekseichuk and colleagues compared intracranial recordings in the temporal area of  
354 macaques undergoing frontoparietal 10Hz Anti-Phase or In-Phase stimulation as well as the  
355 voltage and electric field distribution associated with the two stimulation modes (Alekseichuk  
356 et al., 2019). Results showed a higher electric field magnitude, plus an unidirectional  
357 concentration of field lines for the Anti-Phase condition, whereas for the In-Phase condition  
358 there was a reduced magnitude and a bidirectional flow of electric field lines. The present  
359 electrical field simulation globally revealed similar spatial patterns suggesting that Anti-  
360 Phase stimulation generates more dynamical changes in electrical field distribution,  
361 resembling the traveling wave phenomenon with specific dynamics across time and  
362 characterized by a specific propagation speed. Alpha-band travelling waves recorded with  
363 EEG under stimulus-driven conditions are being increasingly investigated (e.g., (Hindriks et  
364 al., 2014; Lozano-Soldevilla and VanRullen, 2019). A more accurate description of travelling  
365 waves, especially between V1 and V5 areas, which are relatively close, would require a  
366 multi-modal imaging approach combining high temporal and spatial resolution (Giannini et  
367 al., 2018). However, using EEG-derived phase amplitude coupling, it is possible to infer  
368 directionality of signal flow (Nandi et al., 2019). The direction of the coupling is assumed to  
369 be bottom-up if the modulating signal (Alpha band) is recorded in a primary functional  
370 neuronal population, located in lower anatomical areas (V1) whereas the carrier signal  
371 (Gamma band) is rather on higher cognitive and anatomical areas (MT/V5), receiving inputs  
372 mainly from other regions of the cortex (Jiang et al., 2015). Otherwise, the interaction ought  
373 to be top-down. This finds justification from a signal processing perspective as well, where  
374 the power of the carrier signal is being modified under the phase of the modulating signal.

375 Visual stimulus onset has been shown to trigger propagating rhythms in the primary  
376 and secondary visual cortices of monkeys, leading to a specific phase relationship between  
377 the oscillations at both sites (Muller et al., 2014). In humans, propagation of feedforward  
378 flows have been reported during visual motion discrimination, with latencies modulated by  
379 characteristics of the stimulus (Sato et al., 2012; Seriès et al., 2002). Moreover, traveling  
380 waves in the posterior cortex measured by intracortical recordings, show a modulation of  
381 Gamma amplitude through Alpha phase control, with velocities among 0.7-2 m/s  
382 (Bahramisharif et al., 2013), corresponding approximately to half a cycle of an Alpha band  
383 oscillation. Then, this half Alpha phase-lag between stimulation sites, induced by the Anti-  
384 Phase condition, could aid neuronal communication, because of the inherent speed of  
385 propagation of the signals.

386

387 **Changes in bottom-up V1-Alpha phase - V5-Gamma amplitude coupling, but not the**  
388 **opposite direction, explain improved performances induced by Anti-Phase V1<sub>Alpha</sub>-**  
389 **V5<sub>Alpha</sub> stimulation**

390 The present positive behavioral effects were associated with a bottom-up V1-Alpha phase  
391 V5-Gamma amplitude decrease in coupling. This measure reflects the idea that the  
392 feedforward direction between V1 and V5 is regulated by a controlled amplitude modulation  
393 of Alpha-V1 over the phase of Gamma-V5, which scales with improved motion discrimination  
394 in the Anti-Phase group. This suggests the idea that there is an optimal range of Alpha  
395 rhythm magnitude that is more favorable to generate trains of local Gamma bursts, which  
396 might convey the most relevant information of the visual stimulus' features to promote  
397 motion discrimination (Nelli et al., 2017; Tu et al., 2016).

398 This bottom-up Alpha-Gamma interaction is in line with the theory of cross-frequency  
399 nested oscillations (Bonfond et al., 2017). Accordingly, the organization of tasks in the

400 visual system is done through the timed gating of information encoded in local Gamma  
401 bursts, happening every 10-30 ms and that are regulated through the Alpha inhibitory role  
402 (Jensen et al., 2014). Additionally, our finding that changes in phase amplitude coupling  
403 between Alpha-V1 and Gamma-V5 predict behavioural improvements in the Anti-Phase  
404 group is congruent with the fact that motion discrimination has been shown to occur as a  
405 feedforward oscillatory phenomenon (Seriès et al., 2002), and that these oscillations in the  
406 occipital cortex do not only belong to a single frequency band, but rather to a modulation of  
407 Alpha and Gamma rhythms (Bahramisharif et al., 2013).

408 Thus, not only Alpha (Alamia and VanRullen, 2019), but also Gamma oscillations in  
409 the visual cortex appear as phase-sensitive propagating waves following maximal flow of  
410 information (Besserve et al., 2015). Alpha activity as the idling interareal rhythm of the brain,  
411 typically gets perturbed, when there are local bottom-up inputs (von Stein et al., 2000).  
412 Bottom-up inputs that become evident as Gamma activity carrying novelty of a stimulus  
413 (Gray, 1999, p. 199). This mechanism has been reported to be linked to plastic changes in  
414 the visual system (Gray, 1999, p. 199), in the same way as we had hypothesized: it occurs  
415 in the present Anti-Phase stimulation, likewise associated to the bottom-up flow of  
416 information processing.

417 Finally, we did not find any significant changes in the opposite top-down V5-Alpha  
418 phase - V1-Gamma Amplitude coupling and the values measured 10 minutes and 30  
419 minutes after stimulation did not account for changes in motion discrimination performance  
420 or their variance. Although recordings in monkeys' visual cortex have shown a top down  
421 Alpha-Beta that granger-causes a bottom-up Gamma rhythm (Richter et al., 2017), it does  
422 not necessarily contradict our findings since what we report reflect bottom-up coupled  
423 nested oscillations from one neuronal cluster to another, rather than a causal generation of  
424 oscillatory activity from one site to another. These markers indeed imply two different

425 processes of interaction, in most of the circumstances mutually exclusive. Then, there might  
426 be different cross-frequency mechanisms that sustain visual discrimination that are revealed  
427 by these different electrophysiological markers. Exploring this variety of markers might lead  
428 to a better understanding of neural communication supporting visual discrimination.

429

## 430 **CONCLUSIONS**

431 The present experiments revealed that entraining the organization of Anti-Phase oscillation  
432 patterns between V1 and V5 during motion discrimination using bi-focal tACS can enhance  
433 performance persisting even after the stimulation period. These after-effects were  
434 mechanistically partially explained by changes in bottom-up V1-Alpha V5-Gamma Phase-  
435 Amplitude coupling, while the inverse direction did not play any significant role at explaining  
436 the behavioral performance. These new results might be explained by the concept of  
437 traveling waves from V1 to higher visual areas, as well as the precise phase-timing  
438 hypothesis. It is indeed likely that an optimal phase-lag between stimulation sites, induced  
439 by the Anti-Phase tACS entrainment, did promote neuronal communication because of the  
440 inherent speed of wave propagation. Furthermore, we could infer that Alpha Anti-Phase  
441 stimulation, acts as a controller of the Alpha disinhibition-gating capacities and as such,  
442 modulates bottom-up trains of Gamma bursts in the V1-V5 pathway. The precise  
443 characteristics of the Gamma bursts (e.g., phase, time) might play a significant role in  
444 improving the performance in motion discrimination.

445 The present findings point towards the the exciting potential of the current approach  
446 to be extended towards an ameliorated stimulation orchestration with cross-frequency  
447 montages targeting the motion discrimination pathway. Furthermore, it potentially opens a  
448 novel direction of non-invasive interventions to treat patients with deficits in the visual  
449 domain, such as after a stroke.



## 451 **MATERIALS AND METHODS**

452

### 453 **Subjects**

454 50 healthy subjects were recruited (range age: 18 to 40 years old, 24 females). All individuals  
455 were right handed with normal or corrected to normal vision, and had no history of  
456 neurological diseases or cognitive disability. A written consent form was obtained from all  
457 participants prior the experiment. The study was performed according to the guidelines of  
458 the Declaration of Helsinki and approved by the local Swiss Ethics Committee (2017-01761).

459

### 460 **Study design**

461 Individual testing started with a familiarization phase followed by the actual experiment.  
462 During the familiarization phase, we ensured that the subject understood the visual  
463 discrimination task and reached stable performance. After EEG acquisition was prepared, a  
464 baseline block, which consisted of a task-related EEG recording without tACS was started.  
465 After a few minutes of rest, electrodes were placed over the occipital and temporal cortex,  
466 and electrical stimulation was started, remaining on for the entire duration of the block.  
467 Immediately after the start of stimulation, the second timepoint (TP0) was recorded with  
468 concurrently-measured EEG. Thereafter, the stimulation electrodes were removed and after  
469 a few minutes of rest, two succeeding evaluation points (TP10: 10 minutes after stimulation,  
470 TP30: 30 minutes after stimulation) were measured using the same task-related EEG setup,  
471 without tACS (see **Figure 1A**).

472

### 473 **Visual discrimination task**

474 The visual task used is a well-established 2-alternatives, forced-choice, left-right, global  
475 direction discrimination and integration task (150 trials per time point) (Das et al., 2014;

476 Huxlin et al., 2009). The stimulus consisted of a group of black dots moving globally left- or  
477 rightwards on a mid-grey background LCD projector (1024 x 768 Hz, 144 Hz) at a density  
478 of 2.6 dots/° and in a 5° diameter circular aperture centered at cartesian coordinates [-5°,  
479 5°] (i.e., the bottom left quadrant of the visual field, relative to central fixation). Direction  
480 range of the dots was varied between 0° (total coherence) and 360° (complete random  
481 motion). The degree of difficulty was increased with improving task performance by  
482 increasing the range of dot directions within the stimulus. A 3:1 staircase design was  
483 implemented to allow us to compute a threshold level of performance for direction integration  
484 at the end of each timepoint (Das et al., 2014; Huxlin et al., 2009). For every 3 consecutive  
485 correct trials, direction range increased by 40°, while for every incorrect response, it  
486 decreased by 40°. The black dots making up the stimulus were 0.06° in diameter and moved  
487 at a speed of 10°/s over a time lapse of 250ms for a stimulus lifespan of 500ms. At every  
488 stimulus onset, an auditory beep was played for the subject. After each trial, auditory  
489 feedback indicated whether the response was correct or incorrect (see **Figure 2B** and **2C**).  
490

### 491 **Transcranial Electrical Stimulation**

492 Subjects were randomly assigned into 3 groups: In the first experimental group (n=17, 10  
493 females), In-Phase (0° phase lag) bifocal tACS was applied over the right V1 and V5 areas.  
494 The second experimental group (n=18, 8 females), received Anti-Phase (180° phase lag)  
495 bifocal tACS over V1 and V5 areas, also in the right hemisphere. The control group (n=15,  
496 6 females) received Sham (half cycle ramp-up) bifocal stimulation over identical V1 and V5  
497 locations as the first two groups. The electrode placement on V1 and V5 were determined  
498 according to the 10-20 EEG system, i.e. over the O2 and P6 positions, respectively. Figure  
499 1D gives an overview on the stimulating electrodes' positions for the three groups.

500 Prior to the baseline recording, the Alpha peak frequency of each individual was  
501 determined over a 180s-long EEG resting-state recording with the eyes open, used  
502 thereafter as the individualized frequency for the tACS in time point TP0. Mean Alpha  
503 stimulation frequency for the In-Phase group was 9 Hz (range 7-11 Hz), for the Anti-Phase  
504 group: 10 Hz (range 7-12 Hz) and for the Sham group: 10 Hz (range 7-11 Hz).

505

## 506 **Apparatus and devices**

507 All experiments took place inside the same, shielded Faraday cage designed for EEG  
508 recordings, and under the same light conditions. Participants' heads were placed over a  
509 chin-rest at a distance of 60 cm from the presentation screen, assuring a fixed position  
510 across all trials. The task ran on a Windows OS machine, based on a custom Matlab (The  
511 MathWorks Inc., USA) script, using the Psychophysics Toolbox.

512

513 Gaze and pupils' movements were controlled in real time with an EyeLink 1000 Plus  
514 Eye Tracking System (SR Research Ltd., Canada) sampling at a frequency of 1000 Hz. The  
515 task required the subject to fixate a target at the center of the screen for every trial, with a  
516 maximal tolerance for eye deviation from this fixation target of about 1°. If the participant  
517 broke fixation during stimulus presentation, the moving stimulus froze and then disappeared,  
518 the trial was discontinued, and the computer played an unpleasant auditory tone. Once the  
519 participant repositioned their gaze correctly, a novel trial was started.

520

521 Bifocal tACS was delivered by means of two Neuroconn DC Plus stimulators  
522 (Neurocare group) triggered every cycle repeatedly to assure the chosen phase  
523 synchronization between the two stimulation sites. Custom-made, concentric, rubber  
524 electrodes of external diameter 5 cm, internal diameter of 1.5 cm and 2.5 cm of hole diameter



525 were used to deliver stimulation. The intensity was fixed to 3mA corresponding to a current  
526 density of 0.18 mA/cm<sup>2</sup>. The electrodes were held by placing the EEG cap over them. The  
527 period of continuous stimulation, although it was slightly different for every participant, took  
528 on average  $\sim 13 \pm 2$  minutes (SEM), i.e. the time to complete 150 trials of the motion  
529 discrimination task described above.

530

531 EEG was recorded from a 64 channels passive system (Brain Products GMBH) at a  
532 sampling frequency of 5 kHz.

533

534 *- Please insert Figure 1 approximately here -*

535

## 536 **Data Analysis**

537 Behavioral data: For each subject and time point, we extracted direction range thresholds  
538 using all trials, by fitting a Weibull function, which defined the direction range level at which  
539 performance reached 75% correct. These direction range thresholds were then normalized  
540 to the maximum possible range of motion (360°), resulting in a normalized direction range  
541 threshold (NDR), a procedure previously described (Das et al., 2014; Huxlin et al., 2009).

542

$$543 \quad NDR_{threshold}(\%) = \left[ \frac{(360^\circ - WeibullfittedDR)}{360} \right] * 100$$

544

545 Finally, NDR thresholds were corrected for inter-individual variability in baseline  
546 performances by dividing all data by the individual baseline performances (referred as  
547 baseline-corrected NDR throughout the manuscript).

548

549 EEG data: All analyses were performed using MNE-Python (Gramfort et al., 2013) and  
550 customized scripts.

551

552 For the preprocessing, data were re-referenced to the average of signals, filtered  
553 through a Finite Response Filter of order 1, between 0.5 and 45Hz, epoched in 3s blocks.  
554 Every epoch corresponded to the time interval of a trial from the behavioral task. They were  
555 visually inspected to clear up noisy channels or unreadable trials. Bad channels were  
556 interpolated, data was re-sampled to 250Hz. Independent component analysis was used to  
557 remove physiological artifacts (i.e. eyeblinks, muscle twitches).

558

559 For analyses in the frequency domain, Morlet wavelets convolution changing as a  
560 function of frequency was applied to 40 frequency bins, between 2 and 42Hz, increasing  
561 logarithmically.

562

563 For the source reconstruction analyses, data was re-referenced to the average of  
564 signals, noise covariance matrix was calculated to enhance the source approximation, a  
565 template brain and segmentation was used to compute the forward solution for 4098 sources  
566 per hemisphere. The inverse solution was calculated by means of MNE algorithm  
567 (Hämäläinen and Ilmoniemi, 1994). The points belonging to specific areas of interest (i.e. V1  
568 and V5), were defined using the templates provided in the “SPM” open access database  
569 included in the MNE library (Wakeman and Henson, 2015). The source estimates were  
570 computed with dipole orientations perpendicular to the cortical surface (Lin et al., 2006). In  
571 order to extract one time-series per area of interest, we computed the first principal  
572 component from all source dipoles within each area. This first principal component is  
573 representing the source estimates associated with these pre-defined areas. Subsequently,

574 a sign-flip was applied with the objective of avoiding sign ambiguities in the phase of different  
575 source estimates within the same area (Gramfort et al., 2012).

576

577 Specifically, the EEG metrics of interest computed were: Power Spectral Density  
578 (PSD) in the Alpha and Gamma band, both computed in the sensors' space, Coherence in  
579 the Alpha and Gamma Band, V1 Alpha Phase to V5 Gamma Amplitude coupling (ZPAC-  
580 V1pV5a) and, V5 Alpha Phase to V1 Gamma Amplitude coupling (ZPAC-V5pV1a),  
581 computed in the sources' space. All these variables were baseline-normalized. Moreover,  
582 the Phase Amplitude coupling (i.e. PAC) was standardized to avoid confounders by creating  
583 a non-parametrized distribution of values to which to compare the observations through a  
584 Z-score transformation (i.e. ZPAC) (Canolty et al., 2006; Cohen, 2014).

585

586 Thus, PSD ( $\Phi$ ) was calculated taking an average of all electrodes through the Welch's  
587 estimator (Welch, 1967), that considers averaging PSDs from different windows, according  
588 to the formula:

589

$$590 \quad \Phi(f) = \frac{1}{K} \sum_{i=1}^K \frac{1}{W} |X_K(v)|^2, \text{ where } W = \sum_{m=1}^M w^2 [m]$$

591

592 Where K corresponds to the number of segments where a windowed Discret Fourier  
593 Transform is computed, X is the segment where it is computed at some frequency v and w  
594 is the window segment

595

596 (Magnitude-square) Coherence (Carter, 1987) was calculated through:

597

598

$$C_{xy}(f) = \frac{\Phi_{xy}(f) v^2}{\Phi_{xx}(f) \cdot \Phi_{yy}(f)}$$

599

600 V1-V5 coherence analyses are used to investigate frequency-specific phase coupling  
601 between these source areas. Although coherence values might be biased due to source  
602 leakage effects (Palva et al., 2018), we included this metric because it is of relevance given  
603 our brain stimulation approach.

604

605 Phase Amplitude coupling (PAC) (Canolty et al., 2006) was obtained through:

606

$$PAC = n^{-1} \sum_{t=1}^n a_t(f) \cdot e^{i\theta t} v$$

607

608

609 Where  $t$  corresponds to a certain time point,  $a$  denotes the power at a certain specific  
610 frequency for this specific time point,  $i$  is the imaginary variable,  $\theta$  the phase angle and  $n$  the  
611 number of time points. In the manuscript, we will refer to ZPAC V1 Alpha phase – V5  
612 Gamma amplitude (ZPAC-V1p<sub>Alpha</sub>V5a<sub>Gamma</sub>) as a bottom-up modulation and PAC V1  
613 Gamma amplitude – V5 Alpha phase (ZPAC-V1a<sub>Gamma</sub>V5p<sub>Alpha</sub>) as a top-down modulation  
614 (see (Nandi et al., 2019)). In order to verify the lack of influence concerning the signal  
615 leakage problem in the calculation of the Phase Amplitude Coupling, computations showing  
616 the modulation of the phase and amplitude within the same areas of source estimates were  
617 computed (See supplementary figure 2).

618

619 **Statistical Analyses**

620 Behavior: Statistical analyses were carried out using mixed-effect linear models. The  
621 evolution of the baseline-corrected NDR was investigated as a dependent variable, with  
622 stimulation group and time points as the main fixed effects.

623

624 EEG metrics: PSD (Gamma and Alpha components across time) significance within subjects  
625 was tested through a sliding FDR-corrected T-test. Significance within subjects in the  
626 Coherence and Phase-Amplitude coupling spectrums were evaluated through non-  
627 parametric permutation tests and clusters-based corrected for multiple comparisons.  
628 Differences were considered significant when  $p < 0.05$ .

629 A mixed linear model was performed in order to evaluate the variability of the chosen EEG  
630 metric (dependent variable) over time, among stimulation groups.

631

632 Best EEG metric: In order to determine the EEG metric that had the highest impact on the  
633 behavioral scores and then reduce the model space of the baseline-corrected NDR mixed  
634 linear model, an embedded regularization method (i.e., least absolute shrinkage and  
635 selection operator - Lasso) was applied (Tibshirani, 1996) following the Langragian version  
636 of the formula:

637

$$638 \quad \operatorname{argmin}_{\beta} \|y - F \cdot \beta\|^2 + \lambda_s \|\beta\|$$

639

640 Where  $\beta$  corresponds to the unknown vector of weighted coefficients estimated for every  
641 metric (regression coefficient),  $y$  is the matrix with all the labeled metrics,  $\lambda$  is in charge of  
642 the variable selection and  $F$  correspond to the acquired data points. Lasso was selected due  
643 to the fact that it provides a preferred solution with the highest sparsity given the shrink

644 provided by the penalty term. The vector of  $\lambda$  chosen consisted in 30 testing points spaced  
645 between 0 and 1. The number of iterations was set to 1000.

646

647 **Behavior + EEG:** As a second step, covariates that could explain variance in NDR outcome  
648 and a possible interaction effect with stimulation group were added to the first mixed linear  
649 model. A random intercept per subject was used to correct for the dependency between time  
650 points for all models. The residuals of each statistical model were tested for normality by  
651 inspecting histograms and through the omnibus normality test (D'Agostino and Pearson,  
652 1973).

653 **ACKNOWLEDGEMENTS:**

654 This research was funded by the Bertarelli Foundation (Catalyst BC77O7 to FCH & ER), by  
655 the Swiss National Science Foundation (PRIMA PR00P3\_179867 to ER) and by the  
656 Defitech Foundation (to FCH).

657

658 **AUTHOR CONTRIBUTIONS**

659 F.C.H. and E.R. developed the research idea and F.C.H., R.S.G., E.R., K.H. the  
660 experimental design. R.S.G. and E.R. were in charge of the data acquisition and data  
661 analyses. S.Z., M.S. added to the analyses. R.S.G. drafted first version of the manuscript.  
662 All authors revised the manuscript significantly. F.C.H. and E.R provided the funding.

663

664 **COMPETING INTERESTS**

665 The authors declare no competing interests.

666 REFERENCES:

- Aitchison L, Lengyel M. 2016. The Hamiltonian Brain: Efficient Probabilistic Inference with Excitatory-Inhibitory Neural Circuit Dynamics. *PLoS Comput Biol* **12**:e1005186. doi:10.1371/journal.pcbi.1005186
- Alagapan S, Riddle J, Huang WA, Hadar E, Shin HW, Fröhlich F. 2019a. Network-targeted, multi-site direct cortical stimulation enhances working memory by modulating phase lag of low frequency oscillations. *bioRxiv* 514554. doi:10.1101/514554
- Alagapan S, Riddle J, Huang WA, Hadar E, Shin HW, Fröhlich F. 2019b. Network-Targeted, Multi-site Direct Cortical Stimulation Enhances Working Memory by Modulating Phase Lag of Low-Frequency Oscillations. *Cell Rep* **29**:2590-2598.e4. doi:10.1016/j.celrep.2019.10.072
- Alamia A, VanRullen R. 2019. Alpha oscillations and traveling waves: Signatures of predictive coding? *PLoS Biol* **17**:e3000487. doi:10.1371/journal.pbio.3000487
- Alekseichuk I, Falchier AY, Linn G, Xu T, Milham MP, Schroeder CE, Opitz A. 2019. Electric field dynamics in the brain during multi-electrode transcranial electric stimulation. *Nat Commun* **10**:2573. doi:10.1038/s41467-019-10581-7
- Alexander DM, Ball T, Schulze-Bonhage A, Leeuwen C van. 2019. Large-scale cortical travelling waves predict localized future cortical signals. *PLoS Comput Biol* **15**:e1007316. doi:10.1371/journal.pcbi.1007316
- Bahramisharif A, Gerven MAJ van, Aarnoutse EJ, Mercier MR, Schwartz TH, Foxe JJ, Ramsey NF, Jensen O. 2013. Propagating Neocortical Gamma Bursts Are Coordinated by Traveling Alpha Waves. *J Neurosci* **33**:18849–18854. doi:10.1523/JNEUROSCI.2455-13.2013
- Ball K, Sekuler R. 1987. Direction-specific improvement in motion discrimination. *Vision Res* **27**:953–965. doi:10.1016/0042-6989(87)90011-3
- Bastos AM, Vezoli J, Bosman CA, Schoffelen J-M, Oostenveld R, Dowdall JR, De Weerd P, Kennedy H, Fries P. 2015. Visual areas exert feedforward and feedback influences through distinct frequency channels. *Neuron* **85**:390–401. doi:10.1016/j.neuron.2014.12.018
- Bays BC, Visscher KM, Le Dantec CC, Seitz AR. 2015. Alpha-band EEG activity in perceptual learning. *J Vis* **15**. doi:10.1167/15.10.7
- Besserve M, Lowe SC, Logothetis NK, Schölkopf B, Panzeri S. 2015. Shifts of Gamma Phase across Primary Visual Cortical Sites Reflect Dynamic Stimulus-Modulated Information Transfer. *PLoS Biol* **13**:e1002257. doi:10.1371/journal.pbio.1002257
- Blakemore C, Campbell FW. 1969. On the existence of neurones in the human visual system selectively sensitive to the orientation and size of retinal images. *J Physiol* **203**:237-260.1.
- Bonnefond M, Kastner S, Jensen O. 2017. Communication between Brain Areas Based on Nested Oscillations. *eNeuro* **4**. doi:10.1523/ENEURO.0153-16.2017
- Canolty RT, Edwards E, Dalal SS, Soltani M, Nagarajan SS, Kirsch HE, Berger MS, Barbaro NM, Knight RT. 2006. High Gamma Power Is Phase-Locked to Theta Oscillations in Human Neocortex. *Science* **313**:1626–1628. doi:10.1126/science.1128115
- Carter GC. 1987. Coherence and time delay estimation. *Proc IEEE* **75**:236–255. doi:10.1109/PROC.1987.13723
- Cohen MX. 2014. Analyzing Neural Time Series Data: Theory and Practice. MIT Press.
- Cook RD. 1977. Detection of Influential Observation in Linear Regression. *Technometrics* **19**:15–18. doi:10.2307/1268249
- D’Agostino R, Pearson ES. 1973. Tests for Departure from Normality. Empirical Results for the Distributions of  $b_2$  and  $\sqrt{b_1}$ . *Biometrika* **60**:613–622. doi:10.2307/2335012
- Das A, Tadin D, Huxlin KR. 2014. Beyond Blindsight: Properties of Visual Relearning in Cortically Blind Fields. *J Neurosci* **34**:11652–11664. doi:10.1523/JNEUROSCI.1076-14.2014



- Dijk H van, Schoffelen J-M, Oostenveld R, Jensen O. 2008. Prestimulus Oscillatory Activity in the Alpha Band Predicts Visual Discrimination Ability. *J Neurosci* **28**:1816–1823. doi:10.1523/JNEUROSCI.1853-07.2008
- Doesburg SM, Green JJ, McDonald JJ, Ward LM. 2009. From local inhibition to long-range integration: a functional dissociation of alpha-band synchronization across cortical scales in visuospatial attention. *Brain Res* **1303**:97–110. doi:10.1016/j.brainres.2009.09.069
- Donovan I, Carrasco M. 2018. Endogenous spatial attention during perceptual learning facilitates location transfer. *J Vis* **18**:7–7. doi:10.1167/18.11.7
- Donovan I, Shen A, Tortarolo C, Barbot A, Carrasco M. 2020. Exogenous attention facilitates perceptual learning in visual acuity to untrained stimulus locations and features. *J Vis* **20**:18–18. doi:10.1167/jov.20.4.18
- Dosher BA, Lu Z-L. 1998. Perceptual learning reflects external noise filtering and internal noise reduction through channel reweighting. *Proc Natl Acad Sci* **95**:13988–13993. doi:10.1073/pnas.95.23.13988
- Elliott MA, Müller HJ. 1998. Synchronous Information Presented in 40-HZ Flicker Enhances Visual Feature Binding. *Psychol Sci* **9**:277–283. doi:10.1111/1467-9280.00055
- Engel AK, Kreiter AK, Konig P, Singer W. 1991. Synchronization of oscillatory neuronal responses between striate and extrastriate visual cortical areas of the cat. *Proc Natl Acad Sci* **88**:6048–6052. doi:10.1073/pnas.88.14.6048
- Erickson MA, Smith D, Albrecht MA, Silverstein S. 2019. Alpha-band desynchronization reflects memory-specific processes during visual change detection. *Psychophysiology* **56**:e13442. doi:10.1111/psyp.13442
- Faisal AA, Selen LPJ, Wolpert DM. 2008. Noise in the nervous system. *Nat Rev Neurosci* **9**:292–303. doi:10.1038/nrn2258
- Freunberger R, Klimesch W, Sauseng P, Griesmayr B, Höller Y, Pecherstorfer T, Hanslmayr S. 2007. Gamma oscillatory activity in a visual discrimination task. *Brain Res Bull* **71**:593–600. doi:10.1016/j.brainresbull.2006.11.014
- Fries P. 2015. Rhythms For Cognition: Communication Through Coherence. *Neuron* **88**:220–235. doi:10.1016/j.neuron.2015.09.034
- Fries P. 2009. Neuronal Gamma-Band Synchronization as a Fundamental Process in Cortical Computation. *Annu Rev Neurosci* **32**:209–224. doi:10.1146/annurev.neuro.051508.135603
- Fries P. 2005. A mechanism for cognitive dynamics: neuronal communication through neuronal coherence. *Trends Cogn Sci* **9**:474–480. doi:10.1016/j.tics.2005.08.011
- Giannini M, Alexander DM, Nikolaev AR, van Leeuwen C. 2018. Large-Scale Traveling Waves in EEG Activity Following Eye Movement. *Brain Topogr* **31**:608–622. doi:10.1007/s10548-018-0622-2
- Gilbert CD, Sigman M. 2007. Brain States: Top-Down Influences in Sensory Processing. *Neuron* **54**:677–696. doi:10.1016/j.neuron.2007.05.019
- Gilbert CD, Sigman M, Crist RE. 2001. The Neural Basis of Perceptual Learning. *Neuron* **31**:681–697. doi:10.1016/S0896-6273(01)00424-X
- Gollo LL, Mirasso C, Sporns O, Breakspear M. 2014. Mechanisms of Zero-Lag Synchronization in Cortical Motifs. *PLoS Comput Biol* **10**:e1003548. doi:10.1371/journal.pcbi.1003548
- Gramfort A, Kowalski M, Hämäläinen M. 2012. Mixed-norm estimates for the M/EEG inverse problem using accelerated gradient methods. *Phys Med Biol* **57**:1937–1961. doi:10.1088/0031-9155/57/7/1937
- Gramfort A, Luessi M, Larson E, Engemann DA, Strohmeier D, Brodbeck C, Goj R, Jas M, Brooks T, Parkkonen L, Hämäläinen M. 2013. MEG and EEG data analysis with MNE-Python. *Front Neurosci* **7**. doi:10.3389/fnins.2013.00267
- Gray CM. 1999. The Temporal Correlation Hypothesis of Visual Feature Integration: Still Alive and Well. *Neuron* **24**:31–47. doi:10.1016/S0896-6273(00)80820-X

- Gray CM, Singer W. 1989. Stimulus-specific neuronal oscillations in orientation columns of cat visual cortex. *Proc Natl Acad Sci U S A* **86**:1698–1702.
- Griffiths BJ, Mayhew SD, Mullinger KJ, Jorge J, Charest I, Wimber M, Hanslmayr S. 2019. Alpha/beta power decreases track the fidelity of stimulus-specific information. *eLife* **8**:e49562. doi:10.7554/eLife.49562
- Hämäläinen MS, Ilmoniemi RJ. 1994. Interpreting magnetic fields of the brain: minimum norm estimates. *Med Biol Eng Comput* **32**:35–42. doi:10.1007/BF02512476
- Heise K-F, Monteiro TS, Leunissen I, Mantini D, Swinnen SP. 2019. Distinct online and offline effects of alpha and beta transcranial alternating current stimulation (tACS) on continuous bimanual performance and task-set switching. *Sci Rep* **9**:3144. doi:10.1038/s41598-019-39900-0
- Helfrich RF, Knepper H, Nolte G, Strüber D, Rach S, Herrmann CS, Schneider TR, Engel AK. 2014. Selective modulation of interhemispheric functional connectivity by HD-tACS shapes perception. *PLoS Biol* **12**:e1002031. doi:10.1371/journal.pbio.1002031
- Hillyard SA, Teder-Sälejärvi WA, Münte TF. 1998. Temporal dynamics of early perceptual processing. *Curr Opin Neurobiol* **8**:202–210. doi:10.1016/S0959-4388(98)80141-4
- Hindriks R, van Putten MJAM, Deco G. 2014. Intra-cortical propagation of EEG alpha oscillations. *NeuroImage* **103**:444–453. doi:10.1016/j.neuroimage.2014.08.027
- Horowitz SG, Braun AR, Carr WS, Picchioni D, Balkin TJ, Fukunaga M, Dwyer JH. 2009. Decoupling of the brain's default mode network during deep sleep. *Proc Natl Acad Sci U S A* **106**:11376–11381. doi:10.1073/pnas.0901435106
- Huxlin KR, Martin T, Kelly K, Riley M, Friedman DI, Burgin WS, Hayhoe M. 2009. Perceptual Relearning of Complex Visual Motion after V1 Damage in Humans. *J Neurosci* **29**:3981–3991. doi:10.1523/JNEUROSCI.4882-08.2009
- Jehee JFM, Ling S, Swisher JD, van Bergen RS, Tong F. 2012. Perceptual learning selectively refines orientation representations in early visual cortex. *J Neurosci Off J Soc Neurosci* **32**:16747–16753a. doi:10.1523/JNEUROSCI.6112-11.2012
- Jensen O, Gips B, Bergmann TO, Bonnefond M. 2014. Temporal coding organized by coupled alpha and gamma oscillations prioritize visual processing. *Trends Neurosci* **37**:357–369. doi:10.1016/j.tins.2014.04.001
- Jia K, Li S. 2017. Motion direction discrimination training reduces perceived motion repulsion. *Atten Percept Psychophys* **79**:878–887. doi:10.3758/s13414-016-1261-x
- Jiang H, Bahramisharif A, van Gerven MAJ, Jensen O. 2015. Measuring directionality between neuronal oscillations of different frequencies. *NeuroImage* **118**:359–367. doi:10.1016/j.neuroimage.2015.05.044
- Karni A, Sagi D. 1991. Where practice makes perfect in texture discrimination: Evidence for primary visual cortex plasticity. *Proc Natl Acad Sci U S A* **88**:4966–4970. doi:10.1073/pnas.88.11.4966
- Kerkoerle T van, Self MW, Dagnino B, Gariel-Mathis M-A, Poort J, Tooten C van der, Roelfsema PR. 2014. Alpha and gamma oscillations characterize feedback and feedforward processing in monkey visual cortex. *Proc Natl Acad Sci* **111**:14332–14341. doi:10.1073/pnas.1402773111
- Klimesch W. 2012. Alpha-band oscillations, attention, and controlled access to stored information. *Trends Cogn Sci* **16**:606–617. doi:10.1016/j.tics.2012.10.007
- Klimesch W, Sauseng P, Hanslmayr S. 2007. EEG alpha oscillations: the inhibition-timing hypothesis. *Brain Res Rev* **53**:63–88. doi:10.1016/j.brainresrev.2006.06.003
- Lamme VAF, Roelfsema PR. 2000. The distinct modes of vision offered by feedforward and recurrent processing. *Trends Neurosci* **23**:571–579. doi:10.1016/S0166-2236(00)01657-X
- Lewis CM, Bosman CA, Womelsdorf T, Fries P. 2016. Stimulus-induced visual cortical networks are recapitulated by spontaneous local and interareal synchronization. *Proc Natl Acad Sci U*

- SA* **113**:E606-615. doi:10.1073/pnas.1513773113
- Lin F-H, Belliveau JW, Dale AM, Hämäläinen MS. 2006. Distributed current estimates using cortical orientation constraints. *Hum Brain Mapp* **27**:1–13. doi:10.1002/hbm.20155
- Liu Z, Weinshall D. 2000. Mechanisms of generalization in perceptual learning. *Vision Res* **40**:97–109. doi:10.1016/S0042-6989(99)00140-6
- Lozano-Soldevilla D, VanRullen R. 2019. The Hidden Spatial Dimension of Alpha: 10-Hz Perceptual Echoes Propagate as Periodic Traveling Waves in the Human Brain. *Cell Rep* **26**:374-380.e4. doi:10.1016/j.celrep.2018.12.058
- Marko M, Cimrová B, Riečanský I. 2019. Neural theta oscillations support semantic memory retrieval. *Sci Rep* **9**:17667. doi:10.1038/s41598-019-53813-y
- Michalareas G, Vezoli J, van Pelt S, Schoffelen J-M, Kennedy H, Fries P. 2016. Alpha-Beta and Gamma Rhythms Subserve Feedback and Feedforward Influences among Human Visual Cortical Areas. *Neuron* **89**:384–397. doi:10.1016/j.neuron.2015.12.018
- Miyaguchi S, Otsuru N, Kojima S, Yokota H, Saito K, Inukai Y, Onishi H. 2019. Gamma tACS over M1 and cerebellar hemisphere improves motor performance in a phase-specific manner. *Neurosci Lett* **694**:64–68. doi:10.1016/j.neulet.2018.11.015
- Muller L, Chavane F, Reynolds J, Sejnowski TJ. 2018. Cortical travelling waves: mechanisms and computational principles. *Nat Rev Neurosci* **19**:255–268. doi:10.1038/nrn.2018.20
- Muller L, Reynaud A, Chavane F, Destexhe A. 2014. The stimulus-evoked population response in visual cortex of awake monkey is a propagating wave. *Nat Commun* **5**. doi:10.1038/ncomms4675
- Nandi B, Swiatek P, Kocsis B, Ding M. 2019. Inferring the direction of rhythmic neural transmission via inter-regional phase-amplitude coupling (ir-PAC). *Sci Rep* **9**:6933. doi:10.1038/s41598-019-43272-w
- Nelli S, Itthipuripat S, Srinivasan R, Serences JT. 2017. Fluctuations in instantaneous frequency predict alpha amplitude during visual perception. *Nat Commun* **8**:2071. doi:10.1038/s41467-017-02176-x
- Newsome W, Pare E. 1988. A selective impairment of motion perception following lesions of the middle temporal visual area (MT). *J Neurosci* **8**:2201–2211. doi:10.1523/JNEUROSCI.08-06-02201.1988
- Palva JM, Wang SH, Palva S, Zhigalov A, Monto S, Brookes MJ, Schoffelen J-M, Jerbi K. 2018. Ghost interactions in MEG/EEG source space: A note of caution on inter-areal coupling measures. *NeuroImage* **173**:632–643. doi:10.1016/j.neuroimage.2018.02.032
- Palva S, Palva JM. 2011. Functional Roles of Alpha-Band Phase Synchronization in Local and Large-Scale Cortical Networks. *Front Psychol* **2**. doi:10.3389/fpsyg.2011.00204
- Petkoski S, Jirsa VK. 2019. Transmission time delays organize the brain network synchronization. *Philos Transact A Math Phys Eng Sci* **377**. doi:10.1098/rsta.2018.0132
- Polanía R, Nitsche MA, Korman C, Batsikadze G, Paulus W. 2012. The Importance of Timing in Segregated Theta Phase-Coupling for Cognitive Performance. *Curr Biol* **22**:1314–1318. doi:10.1016/j.cub.2012.05.021
- Richter CG, Thompson WH, Bosman CA, Fries P. 2017. Top-Down Beta Enhances Bottom-Up Gamma. *J Neurosci Off J Soc Neurosci* **37**:6698–6711. doi:10.1523/JNEUROSCI.3771-16.2017
- Rodman HR, Gross CG, Albright TD. 1990. Afferent basis of visual response properties in area MT of the macaque. II. Effects of superior colliculus removal. *J Neurosci Off J Soc Neurosci* **10**:1154–1164.
- Roelfsema PR, Engel AK, König P, Singer W. 1997. Visuomotor integration is associated with zero time-lag synchronization among cortical areas. *Nature* **385**:157–161. doi:10.1038/385157a0
- Sato TK, Nauhaus I, Carandini M. 2012. Traveling Waves in Visual Cortex. *Neuron* **75**:218–229. doi:10.1016/j.neuron.2012.06.029

- Saturnino GB, Madsen KH, Siebner HR, Thielscher A. 2017. How to target inter-regional phase synchronization with dual-site Transcranial Alternating Current Stimulation. *NeuroImage* **163**:68–80. doi:10.1016/j.neuroimage.2017.09.024
- Sauseng P, Klimesch W, Heise KF, Gruber WR, Holz E, Karim AA, Glennon M, Gerloff C, Birbaumer N, Hummel FC. 2009. Brain oscillatory substrates of visual short-term memory capacity. *Curr Biol CB* **19**:1846–1852. doi:10.1016/j.cub.2009.08.062
- Schwab BC, Misselhorn J, Engel AK. 2019. Modulation of large-scale cortical coupling by transcranial alternating current stimulation. *Brain Stimul Basic Transl Clin Res Neuromodulation* **12**:1187–1196. doi:10.1016/j.brs.2019.04.013
- Seriès P, Georges S, Lorenceau J, Frégnac Y. 2002. Orientation dependent modulation of apparent speed: a model based on the dynamics of feed-forward and horizontal connectivity in V1 cortex. *Vision Res* **42**:2781–2797. doi:10.1016/s0042-6989(02)00302-4
- Seung HS, Richardson TJ, Lagarias JC, Hopfield JJ. 1998. Minimax and Hamiltonian Dynamics of Excitatory-Inhibitory Networks In: Jordan MI, Kearns MJ, Solla SA, editors. *Advances in Neural Information Processing Systems* 10. MIT Press. pp. 329–335.
- Seymour RA, Rippon G, Gooding-Williams G, Schoffelen JM, Kessler K. 2019. Dysregulated oscillatory connectivity in the visual system in autism spectrum disorder. *Brain* **142**:3294–3305. doi:10.1093/brain/awz214
- Shen W, McKeown CR, Demas JA, Cline HT. 2011. Inhibition to excitation ratio regulates visual system responses and behavior in vivo. *J Neurophysiol* **106**:2285–2302. doi:10.1152/jn.00641.2011
- Shibata K, Chang L-H, Kim D, Náñez JE, Kamitani Y, Watanabe T, Sasaki Y. 2012. Decoding reveals plasticity in V3A as a result of motion perceptual learning. *PLoS One* **7**:e44003. doi:10.1371/journal.pone.0044003
- Siegel M, Donner TH, Engel AK. 2012. Spectral fingerprints of large-scale neuronal interactions. *Nat Rev Neurosci* **13**:121–134. doi:10.1038/nrn3137
- Siegel M, Donner TH, Oostenveld R, Fries P, Engel AK. 2008. Neuronal synchronization along the dorsal visual pathway reflects the focus of spatial attention. *Neuron* **60**:709–719. doi:10.1016/j.neuron.2008.09.010
- Siegel M, Donner TH, Oostenveld R, Fries P, Engel AK. 2007. High-Frequency Activity in Human Visual Cortex Is Modulated by Visual Motion Strength. *Cereb Cortex* **17**:732–741. doi:10.1093/cercor/bhk025
- Sigala R, Haufe S, Roy D, Dinse HR, Ritter P. 2014. The role of alpha-rhythm states in perceptual learning: insights from experiments and computational models. *Front Comput Neurosci* **8**. doi:10.3389/fncom.2014.00036
- Simoncelli EP, Heeger DJ. 1998. A model of neuronal responses in visual area MT. *Vision Res* **38**:743–761. doi:10.1016/s0042-6989(97)00183-1
- Strüber D, Rach S, Neuling T, Herrmann CS. 2015. On the possible role of stimulation duration for after-effects of transcranial alternating current stimulation. *Front Cell Neurosci* **9**. doi:10.3389/fncel.2015.00311
- Thielscher A, Antunes A, Saturnino GB. 2015. Field modeling for transcranial magnetic stimulation: A useful tool to understand the physiological effects of TMS? 2015 37th Annual International Conference of the IEEE Engineering in Medicine and Biology Society (EMBC). Presented at the 2015 37th Annual International Conference of the IEEE Engineering in Medicine and Biology Society (EMBC). Milan: IEEE. pp. 222–225. doi:10.1109/EMBC.2015.7318340
- Tibshirani R. 1996. Regression Shrinkage and Selection via the Lasso. *J R Stat Soc Ser B Methodol* **58**:267–288.
- Townsend RG, Solomon SS, Martin PR, Solomon SG, Gong P. 2017. Visual Motion Discrimination by Propagating Patterns in Primate Cerebral Cortex. *J Neurosci* **37**:10074–



10084. doi:10.1523/JNEUROSCI.1538-17.2017
- Tu Y, Zhang Z, Tan A, Peng W, Hung YS, Moayed M, Iannetti GD, Hu L. 2016. Alpha and gamma oscillation amplitudes synergistically predict the perception of forthcoming nociceptive stimuli. *Hum Brain Mapp* **37**:501–514. doi:10.1002/hbm.23048
- Vieira PG, Krause MR, Pack CC. 2020. tACS entrains neural activity while somatosensory input is blocked. *PLOS Biol* **18**:e3000834. doi:10.1371/journal.pbio.3000834
- Violante IR, Li LM, Carmichael DW, Lorenz R, Leech R, Hampshire A, Rothwell JC, Sharp DJ. 2017. Externally induced frontoparietal synchronization modulates network dynamics and enhances working memory performance. *eLife* **6**:e22001. doi:10.7554/eLife.22001
- von Stein A, Chiang C, König P. 2000. Top-down processing mediated by interareal synchronization. *Proc Natl Acad Sci U S A* **97**:14748–14753.
- Voytek B, Knight RT. 2015. Dynamic network communication as a unifying neural basis for cognition, development, aging, and disease. *Biol Psychiatry* **77**:1089–1097. doi:10.1016/j.biopsych.2015.04.016
- Wakeman DG, Henson RN. 2015. A multi-subject, multi-modal human neuroimaging dataset. *Sci Data* **2**:150001. doi:10.1038/sdata.2015.1
- Wang J, Brown R, Dobkins KR, McDowell JE, Clementz BA. 2010. Diminished Parietal Cortex Activity Associated with Poor Motion Direction Discrimination Performance in Schizophrenia. *Cereb Cortex* **20**:1749–1755. doi:10.1093/cercor/bhp243
- Welch P. 1967. The use of fast Fourier transform for the estimation of power spectra: A method based on time averaging over short, modified periodograms. *IEEE Trans Audio Electroacoustics* **15**:70–73. doi:10.1109/TAU.1967.1161901
- Wiesenfeld K, Moss F. 1995. Stochastic resonance and the benefits of noise: from ice ages to crayfish and SQUIDS. *Nature* **373**:33–36. doi:10.1038/373033a0
- Yang T, Maunsell JHR. 2004. The effect of perceptual learning on neuronal responses in monkey visual area V4. *J Neurosci Off J Soc Neurosci* **24**:1617–1626. doi:10.1523/JNEUROSCI.4442-03.2004
- Yaple Z, Vakhrushev R. 2018. Modulation of the frontal-parietal network by low intensity anti-phase 20 Hz transcranial electrical stimulation boosts performance in the attentional blink task. *Int J Psychophysiol Off J Int Organ Psychophysiol* **127**:11–16. doi:10.1016/j.ijpsycho.2018.02.014
- Zammit N, Falzon O, Camilleri K, Muscat R. 2018. Working memory alpha-beta band oscillatory signatures in adolescents and young adults. *Eur J Neurosci* **48**:2527–2536. doi:10.1111/ejn.13897
- Zhang H, Morrone MC, Alais D. 2019. Behavioural oscillations in visual orientation discrimination reveal distinct modulation rates for both sensitivity and response bias. *Sci Rep* **9**:1115. doi:10.1038/s41598-018-37918-4

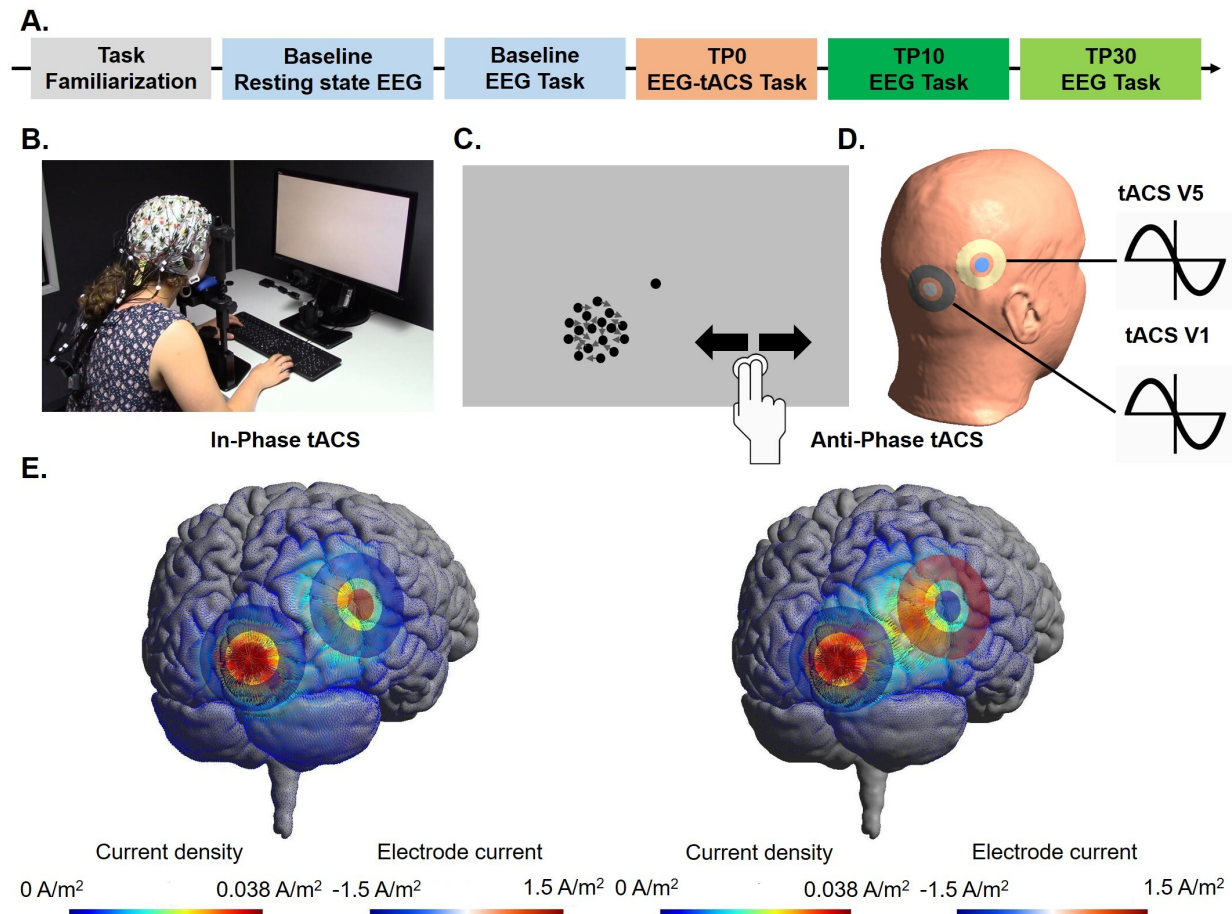

667

668

669 **Figure 1. (A) Experimental design.** The total duration of the experiment was around  
670 3hrs. **(B) Real example** of the experimental setup inside the Faraday's cage. The EEG  
671 system and an ongoing visual task are shown. **(B) Schematic example of the motion**  
672 **discrimination task. (C) Schematic of the bifocal tACS** applied with concentric  
673 electrodes over P6 and O2 while subject performs the global direction discrimination visual  
674 task. **(D) Electrical field 3D representation of bifocal tACS** at the two different phase  
675 differences (Thielscher et al., 2015). The dispersion of the field does not change over time  
676 in the two conditions, but rather the magnitude of the electrical field lines (Saturnino et al.,  
677 2017).

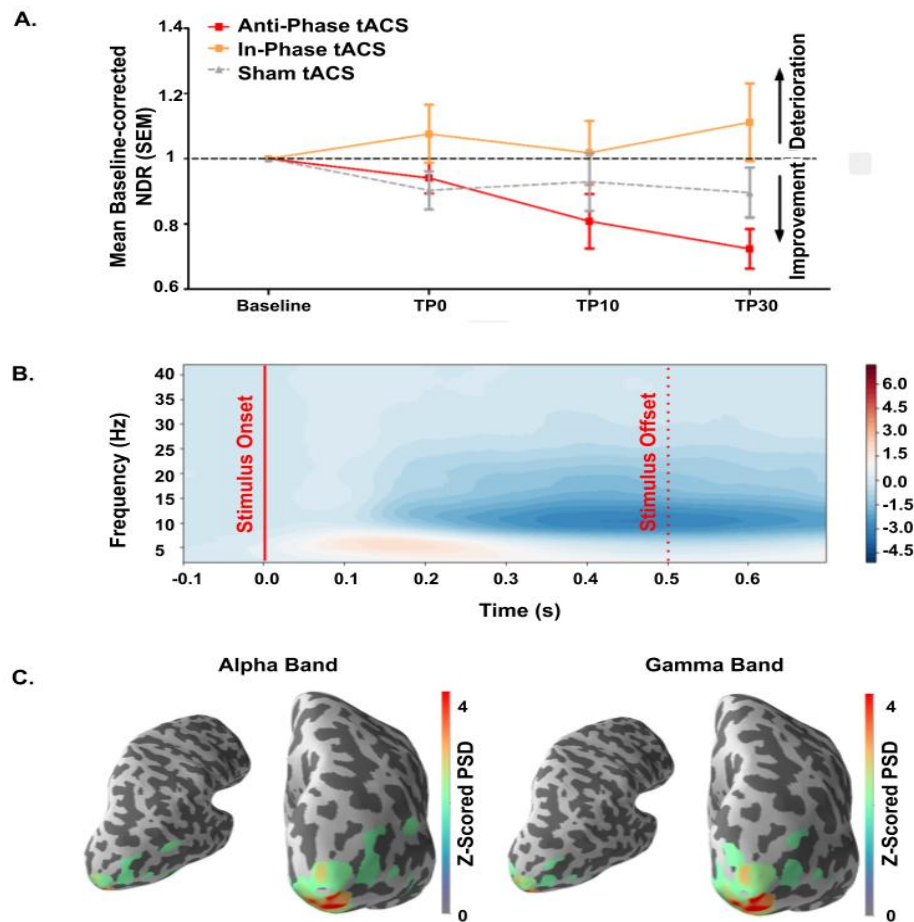

692 **Figure 2. (A) Baseline-corrected NDR (Normalized Direction Range) threshold**  
693 **evolution across time-points for the three stimulation conditions. Bars correspond to**  
694 **Standard Errors of the Mean (SEM). Anti-Phase stimulation induced an increased**  
695 **performance translating into a significantly pronounced behavioral improvement over time**  
696 **at the group level. The behavioral performance of the Anti-Phase group was significantly**  
697 **enhanced compared to the In-Phase group. (B) Time-frequency representation**  
698 **of the averaged response during a trial at the baseline period, before the stimulation. It shows a**  
699 **typical Event Related Synchronization at (ERS) the Theta/Alpha band, followed by an Event**  
700 **Related Desynchronization (ERD) in the Beta band. (C) PSD projected on 3D brain.**

701

702

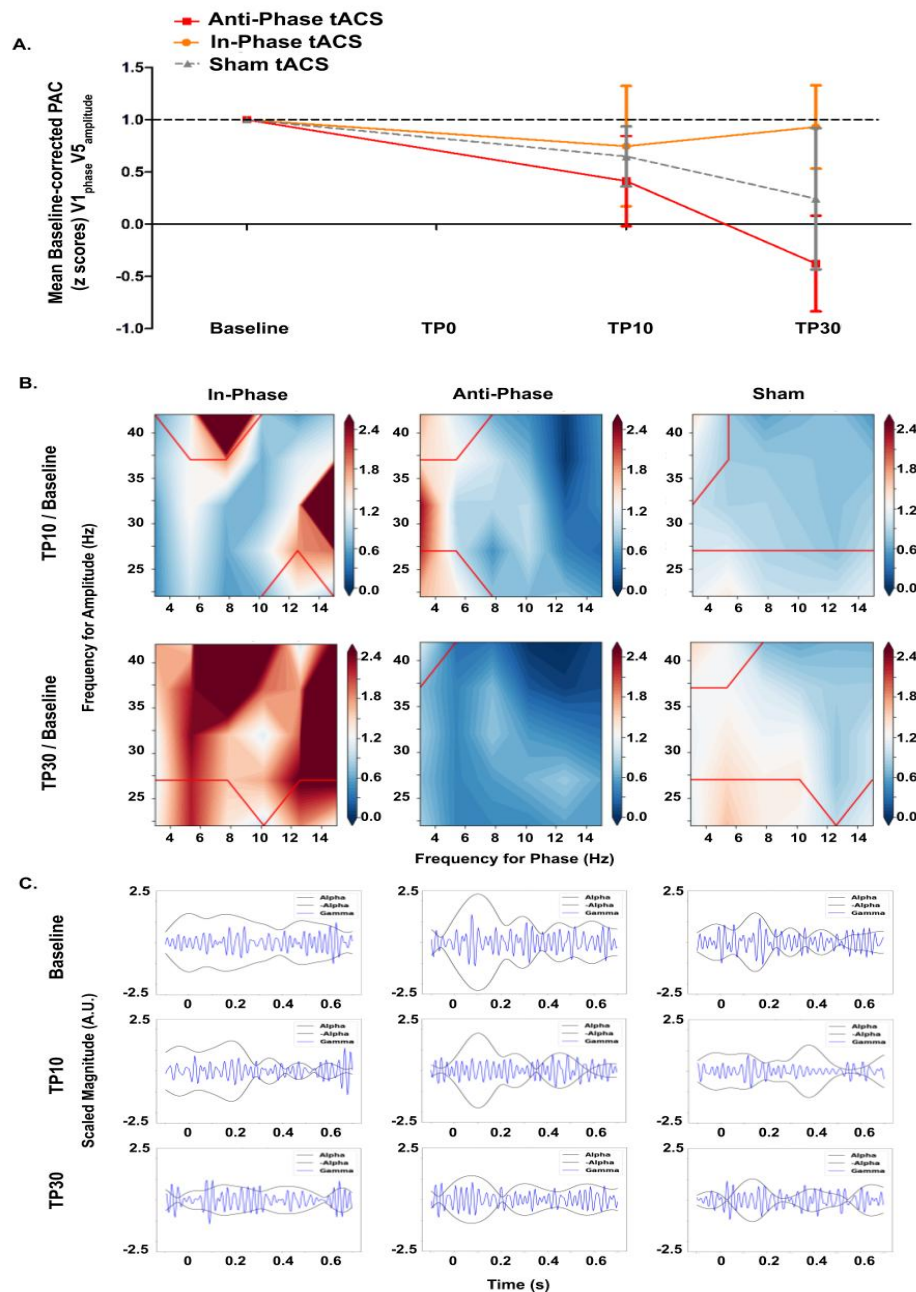

721 **Figure 3. (A) Baseline-corrected, bottom-up V1-Alpha phase V5-Gamma Amplitude**  
 722 **coupling across time-points.** Bars correspond to Standard Errors of the Mean (SEM).  
 723 Please note the strong decrease for the In-Phase group towards TP30. **(B) Averaged,**  
 724 **baseline-corrected, significant clusters ( $p < 0.5$ ) from the V1-Gamma amplitude V5-**  
 725 **Alpha phase coupling spectrums** for the three stimulation groups and for the two time  
 726 points after stimulation averaged during the stimulus presentation interval. **(C) Alpha V1**  
 727 **Gamma V5 Phase-amplitude coupling during stimulus presentation**



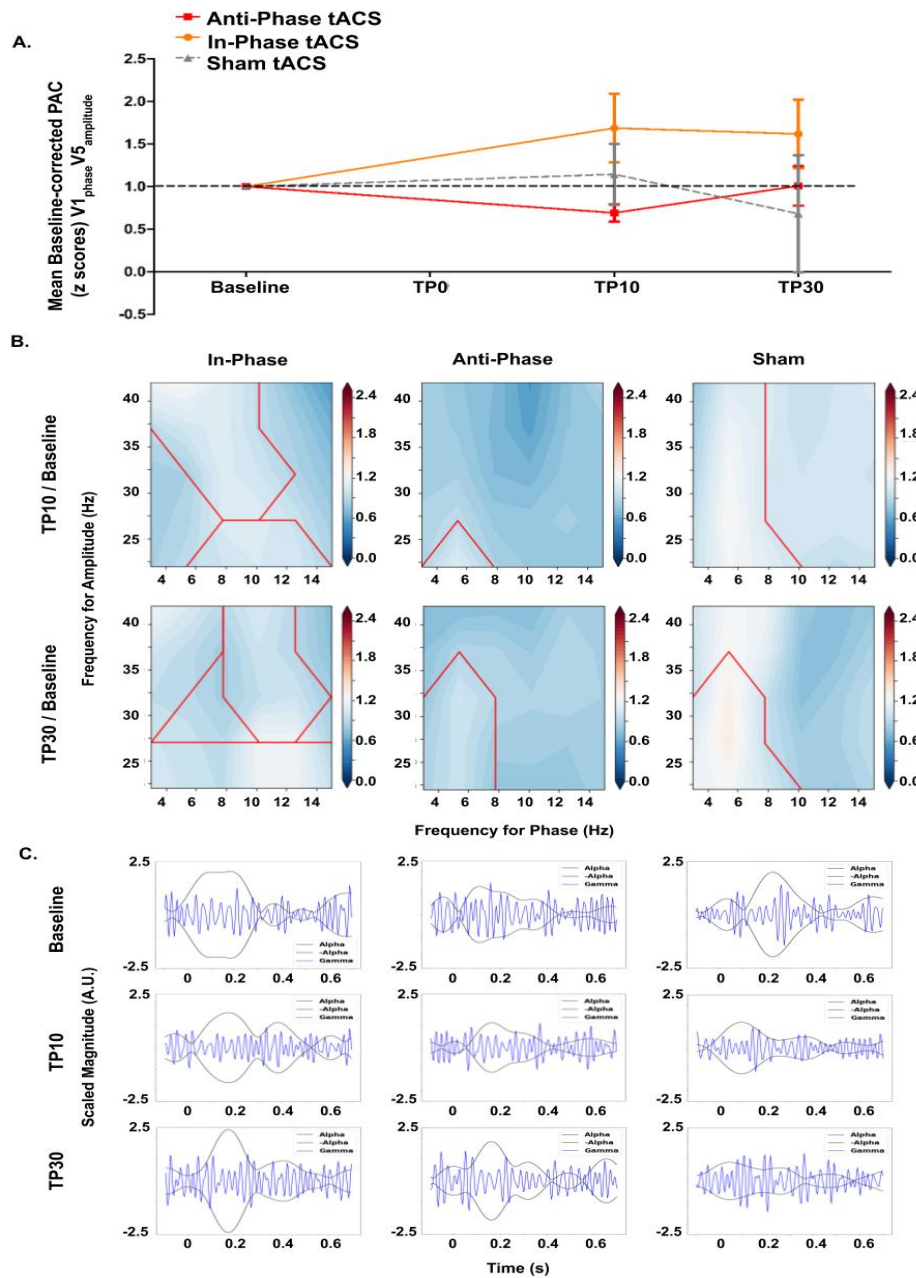

746 **Figure 4. (A) Baseline-corrected, top-down V1-Gamma amplitude V5-Alpha phase**  
747 **coupling across time-points.** Bars correspond to Standard Errors of the Mean (SEM).  
748 Please note the strong decrease for the In-Phase group towards TP30. **(B) Averaged,**  
749 **baseline-corrected, significant clusters ( $p < 0.5$ ) from the V1-Gamma amplitude V5-**  
750 **Alpha phase coupling spectrums** for the three stimulation groups and for the two time  
751 points after stimulation averaged during the stimulus presentation interval. **(C) Gamma V1**  
752 **Alpha V5 Phase-amplitude coupling during stimulus presentation**

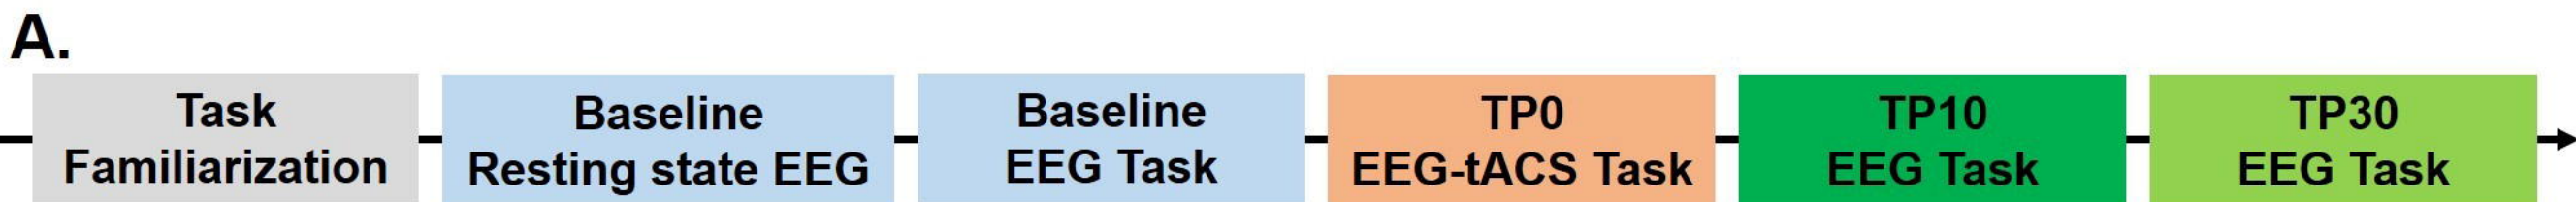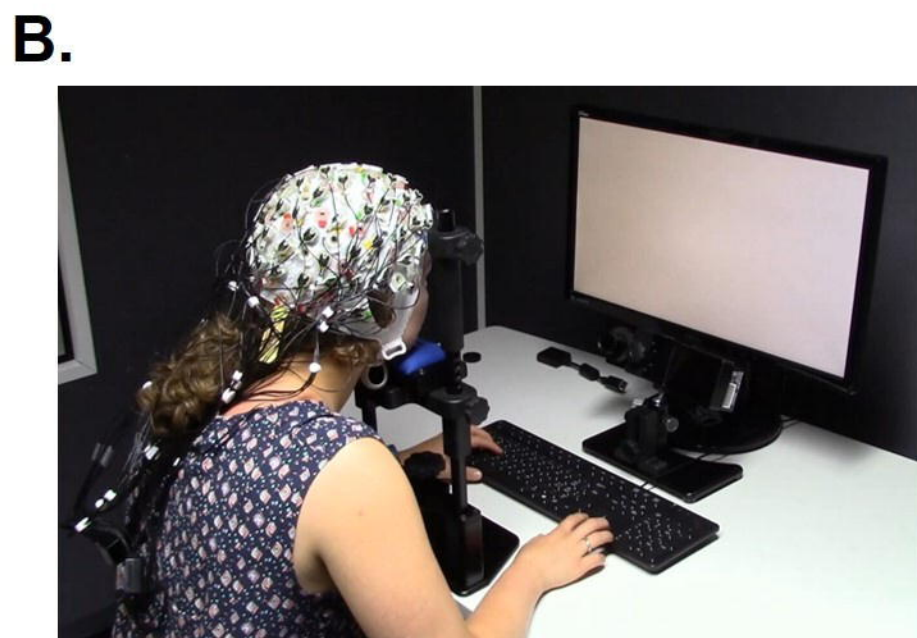

In-Phase tACS

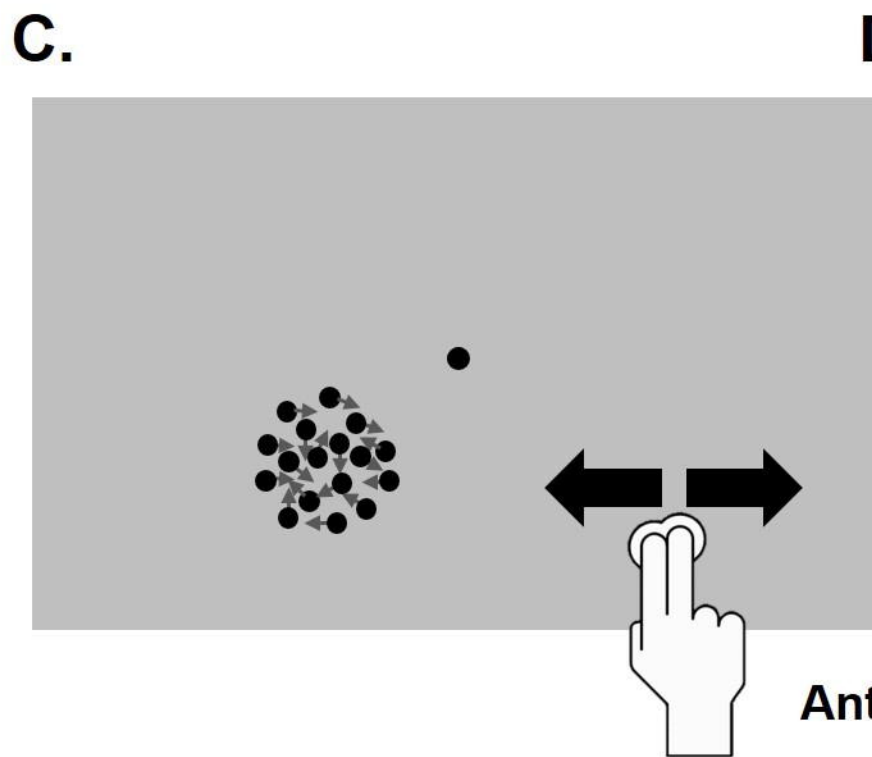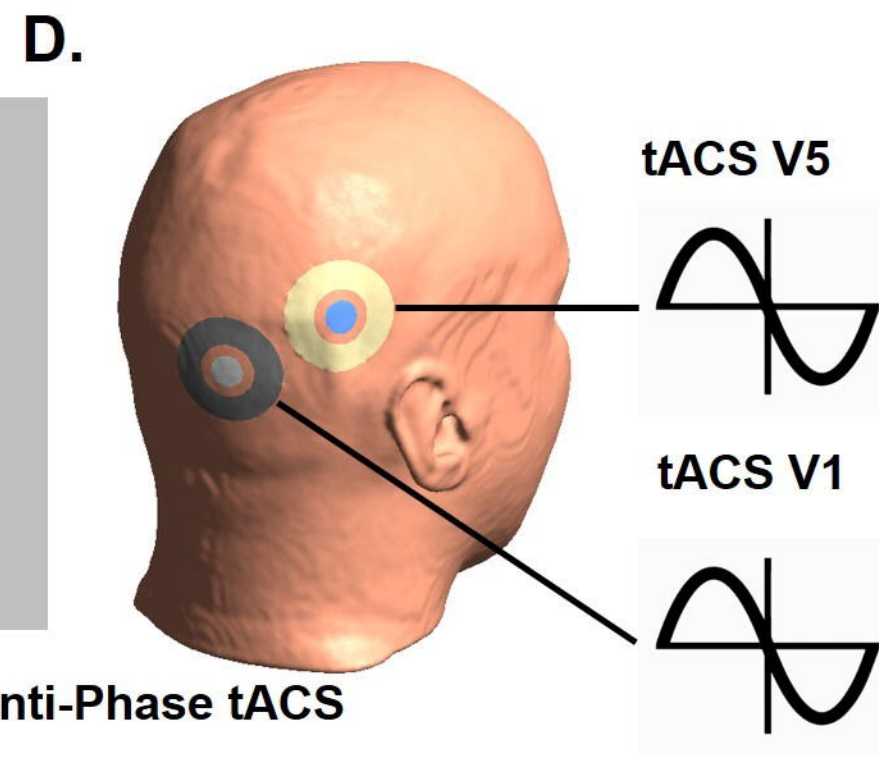

Anti-Phase tACS

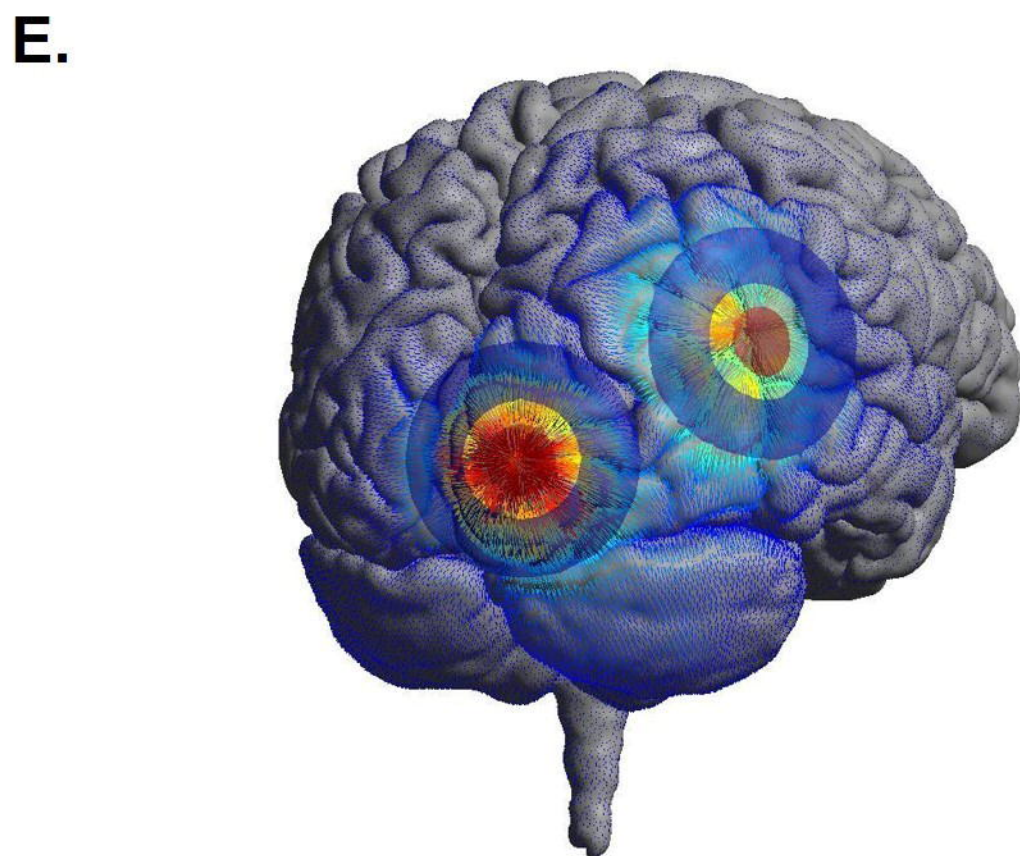

Current density

Electrode current

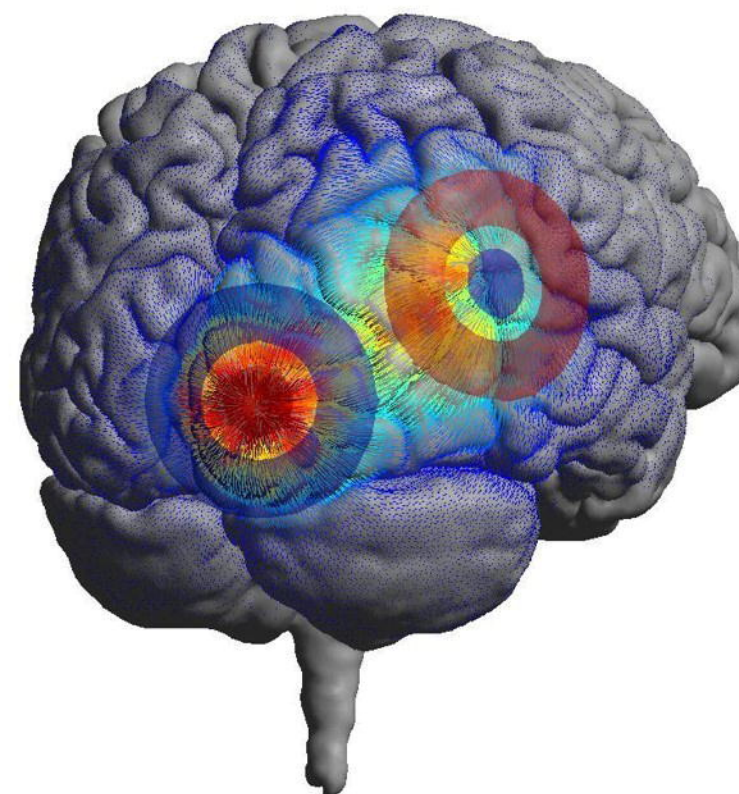

Current density

Electrode current

0 A/m<sup>2</sup>

0.038 A/m<sup>2</sup> -1.5 A/m<sup>2</sup>

1.5 A/m<sup>2</sup> 0 A/m<sup>2</sup>

0.038 A/m<sup>2</sup> -1.5 A/m<sup>2</sup>

1.5 A/m<sup>2</sup>

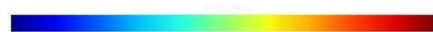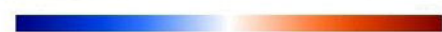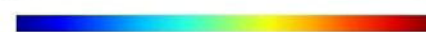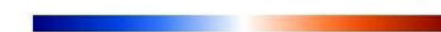



**A.**

bioRxiv preprint doi: <https://doi.org/10.1101/2020.11.05.382267>; this version posted November 17, 2020. The copyright holder for this preprint (which was not certified by peer review) is the author/funder. All rights reserved. No reuse allowed without permission.

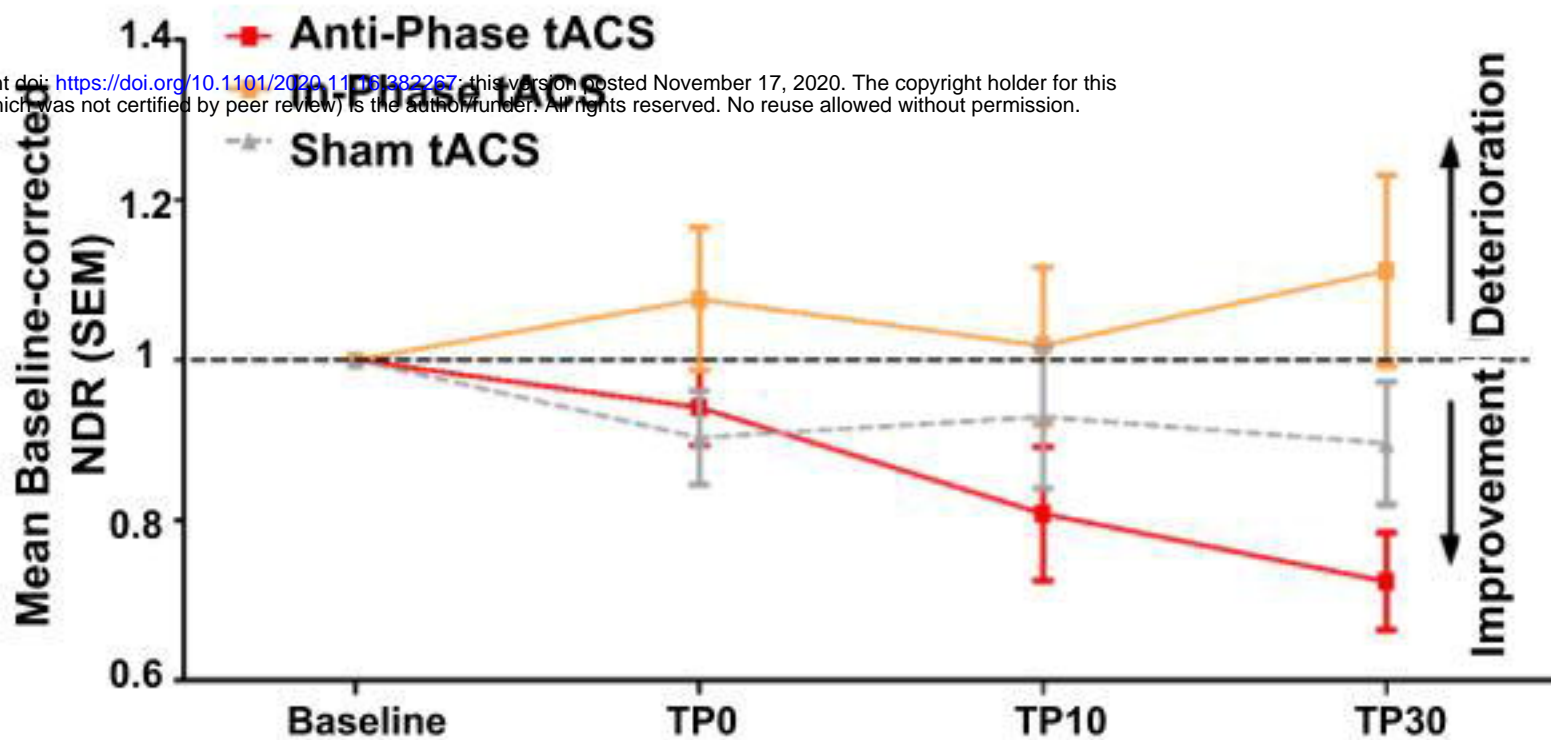**B.**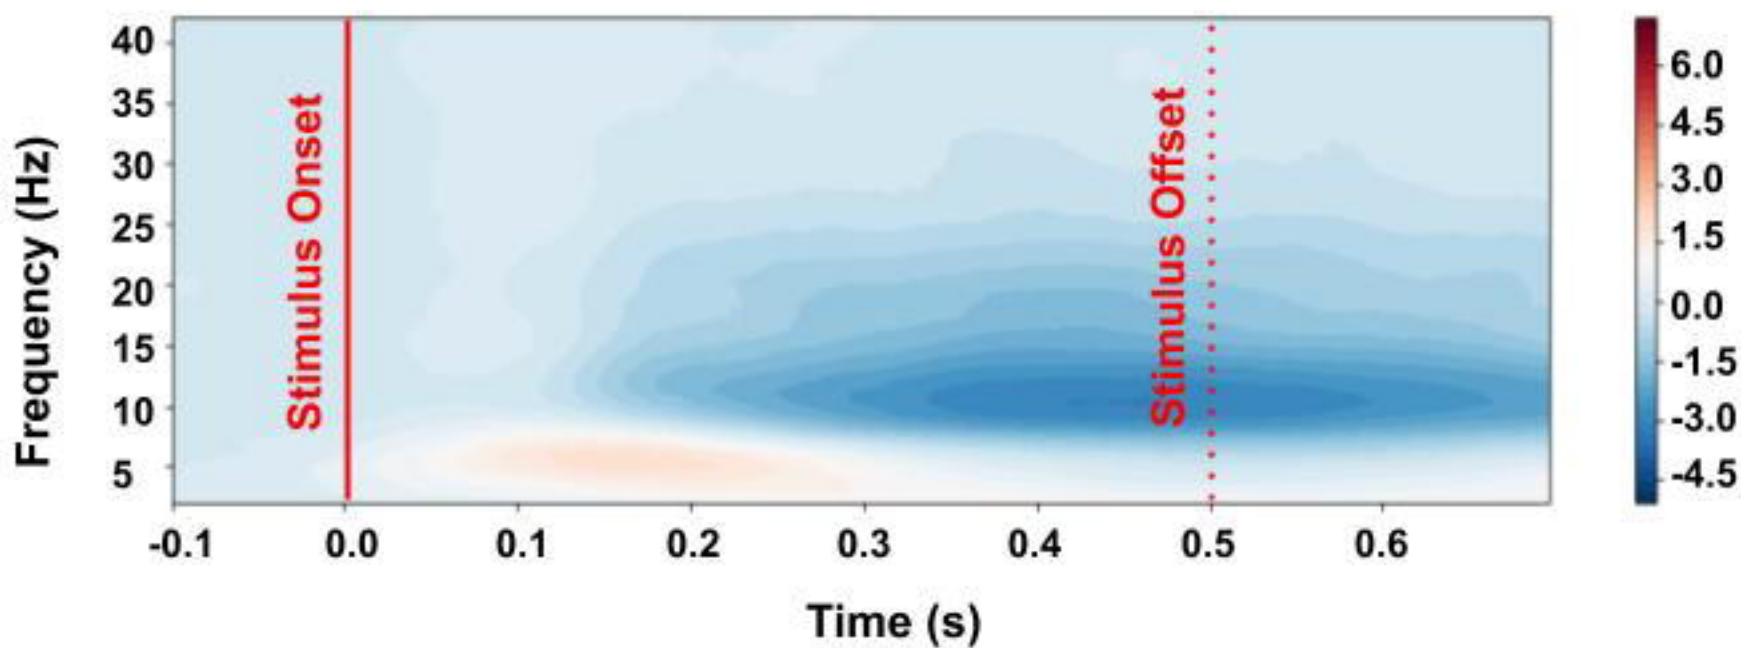**C.**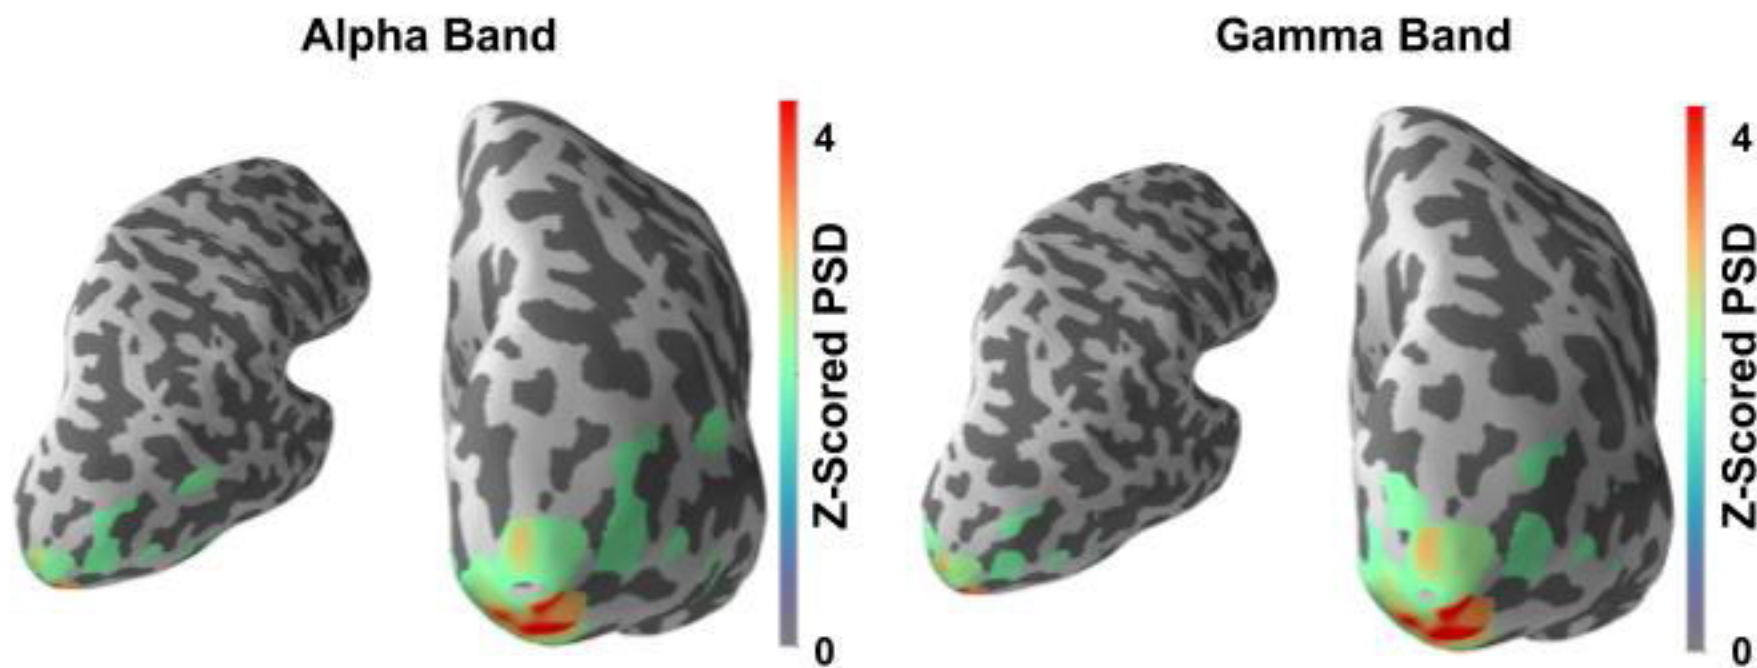



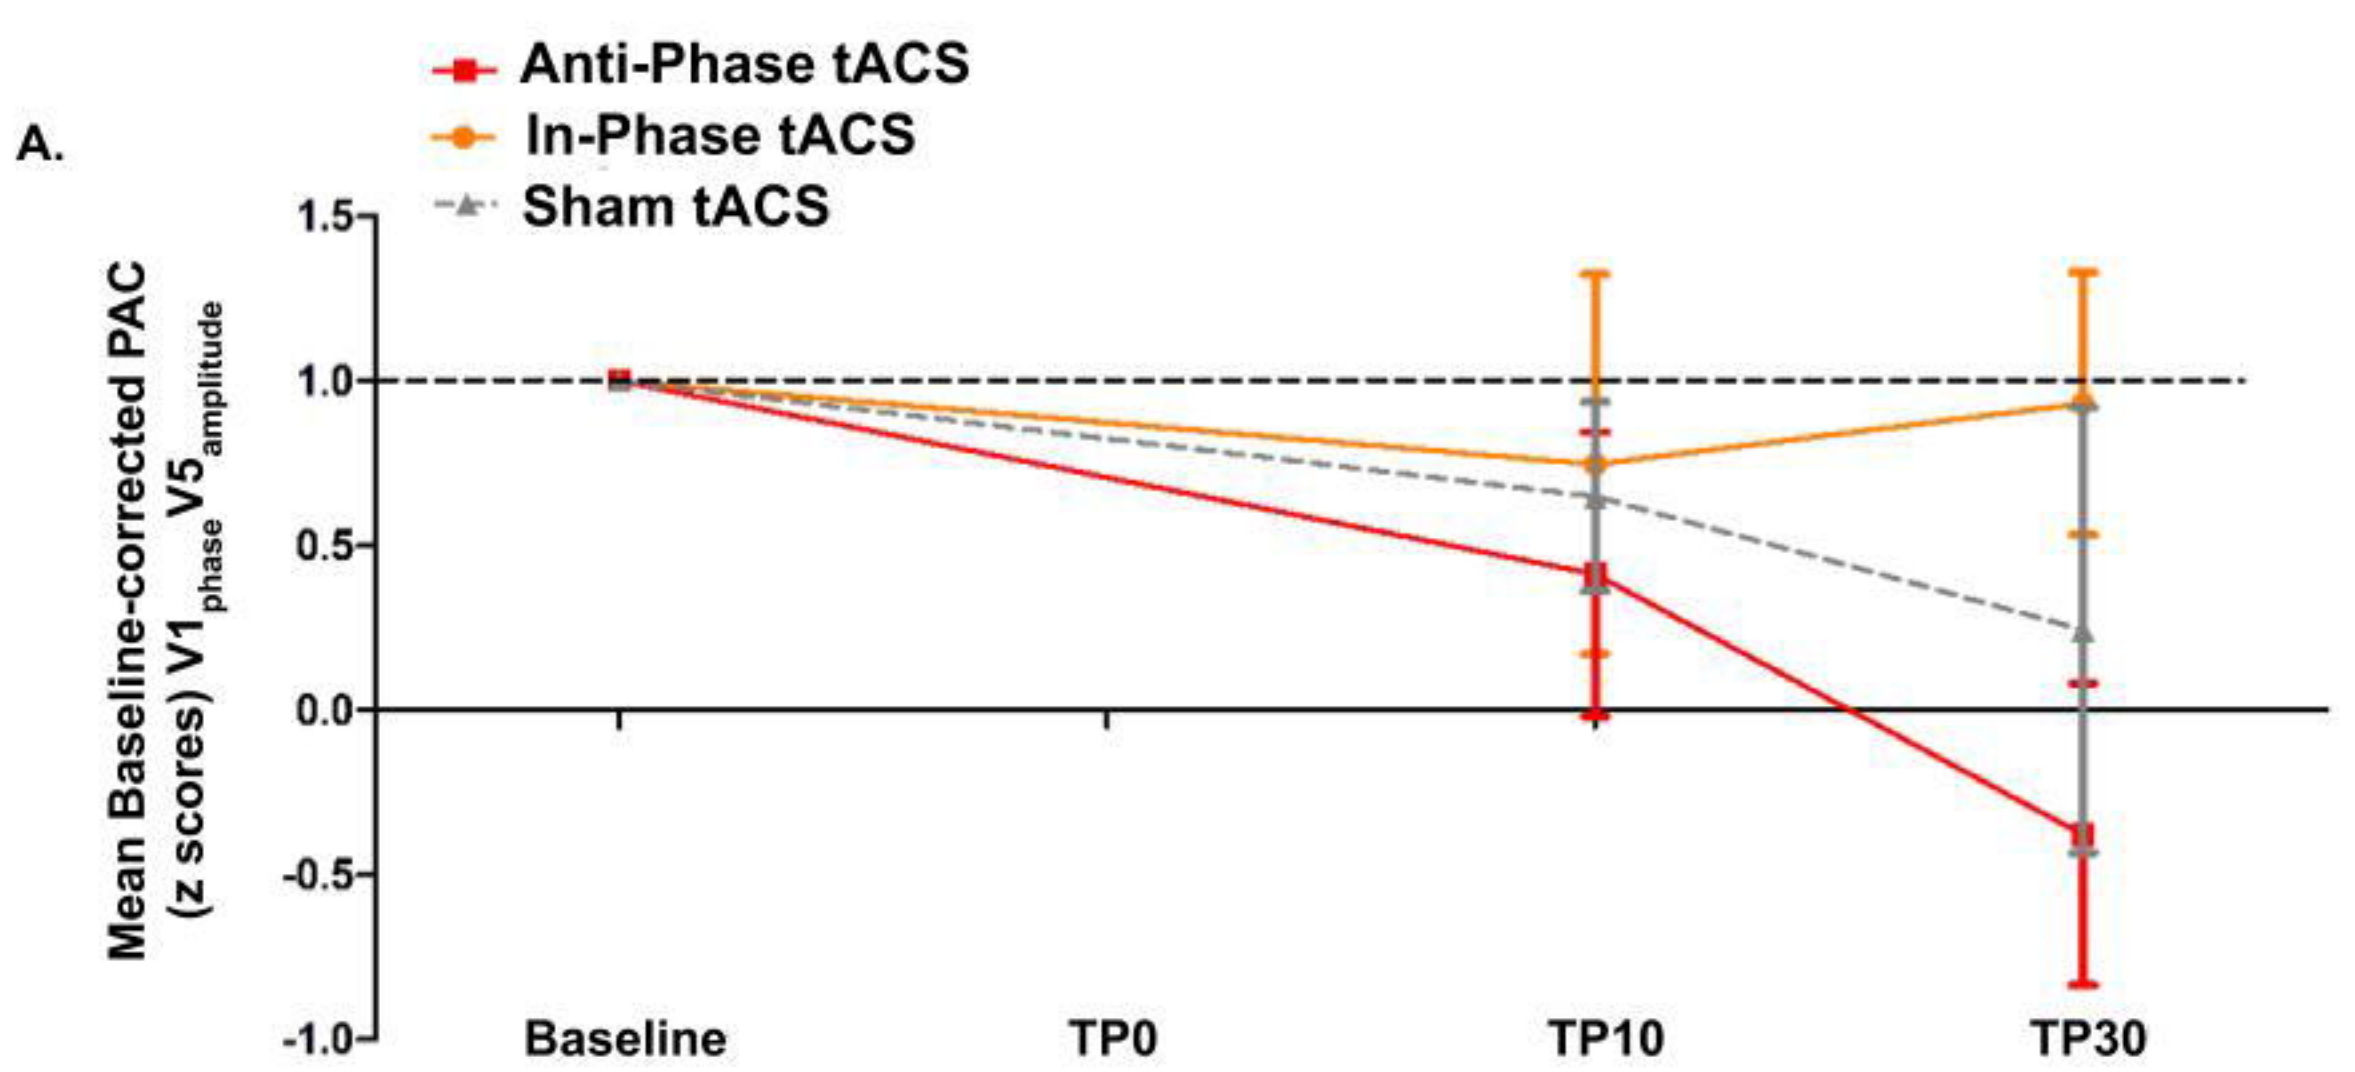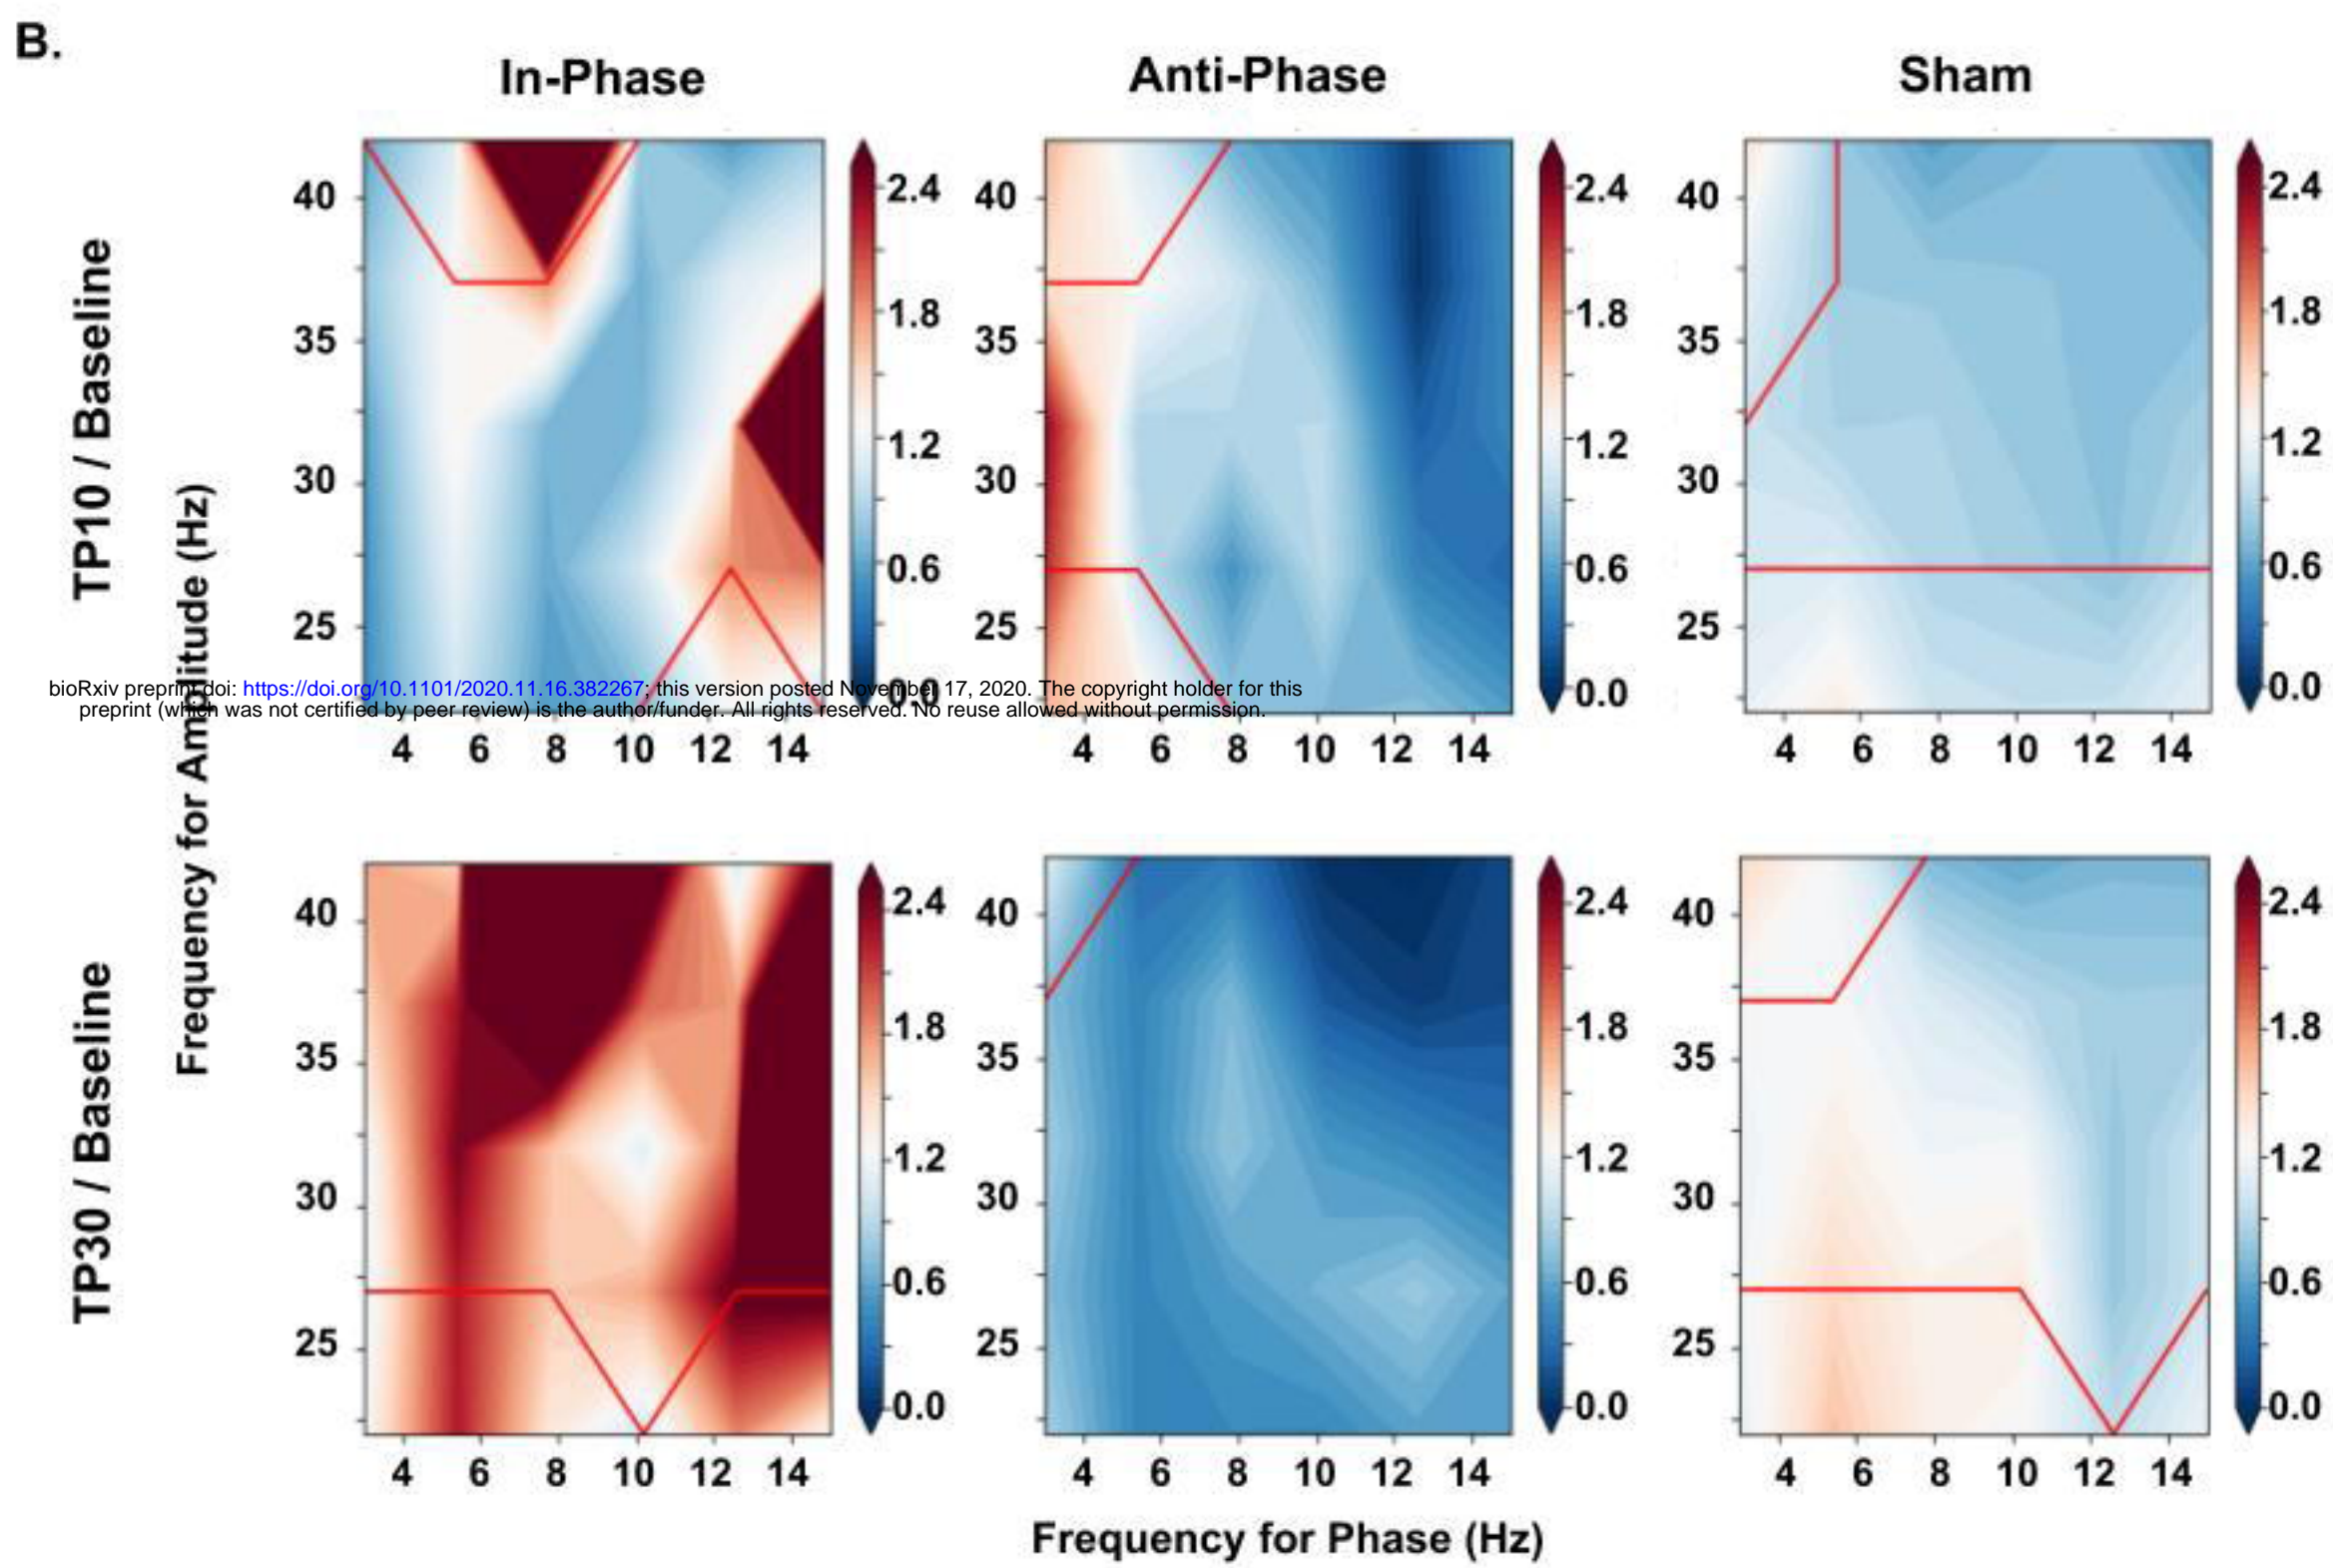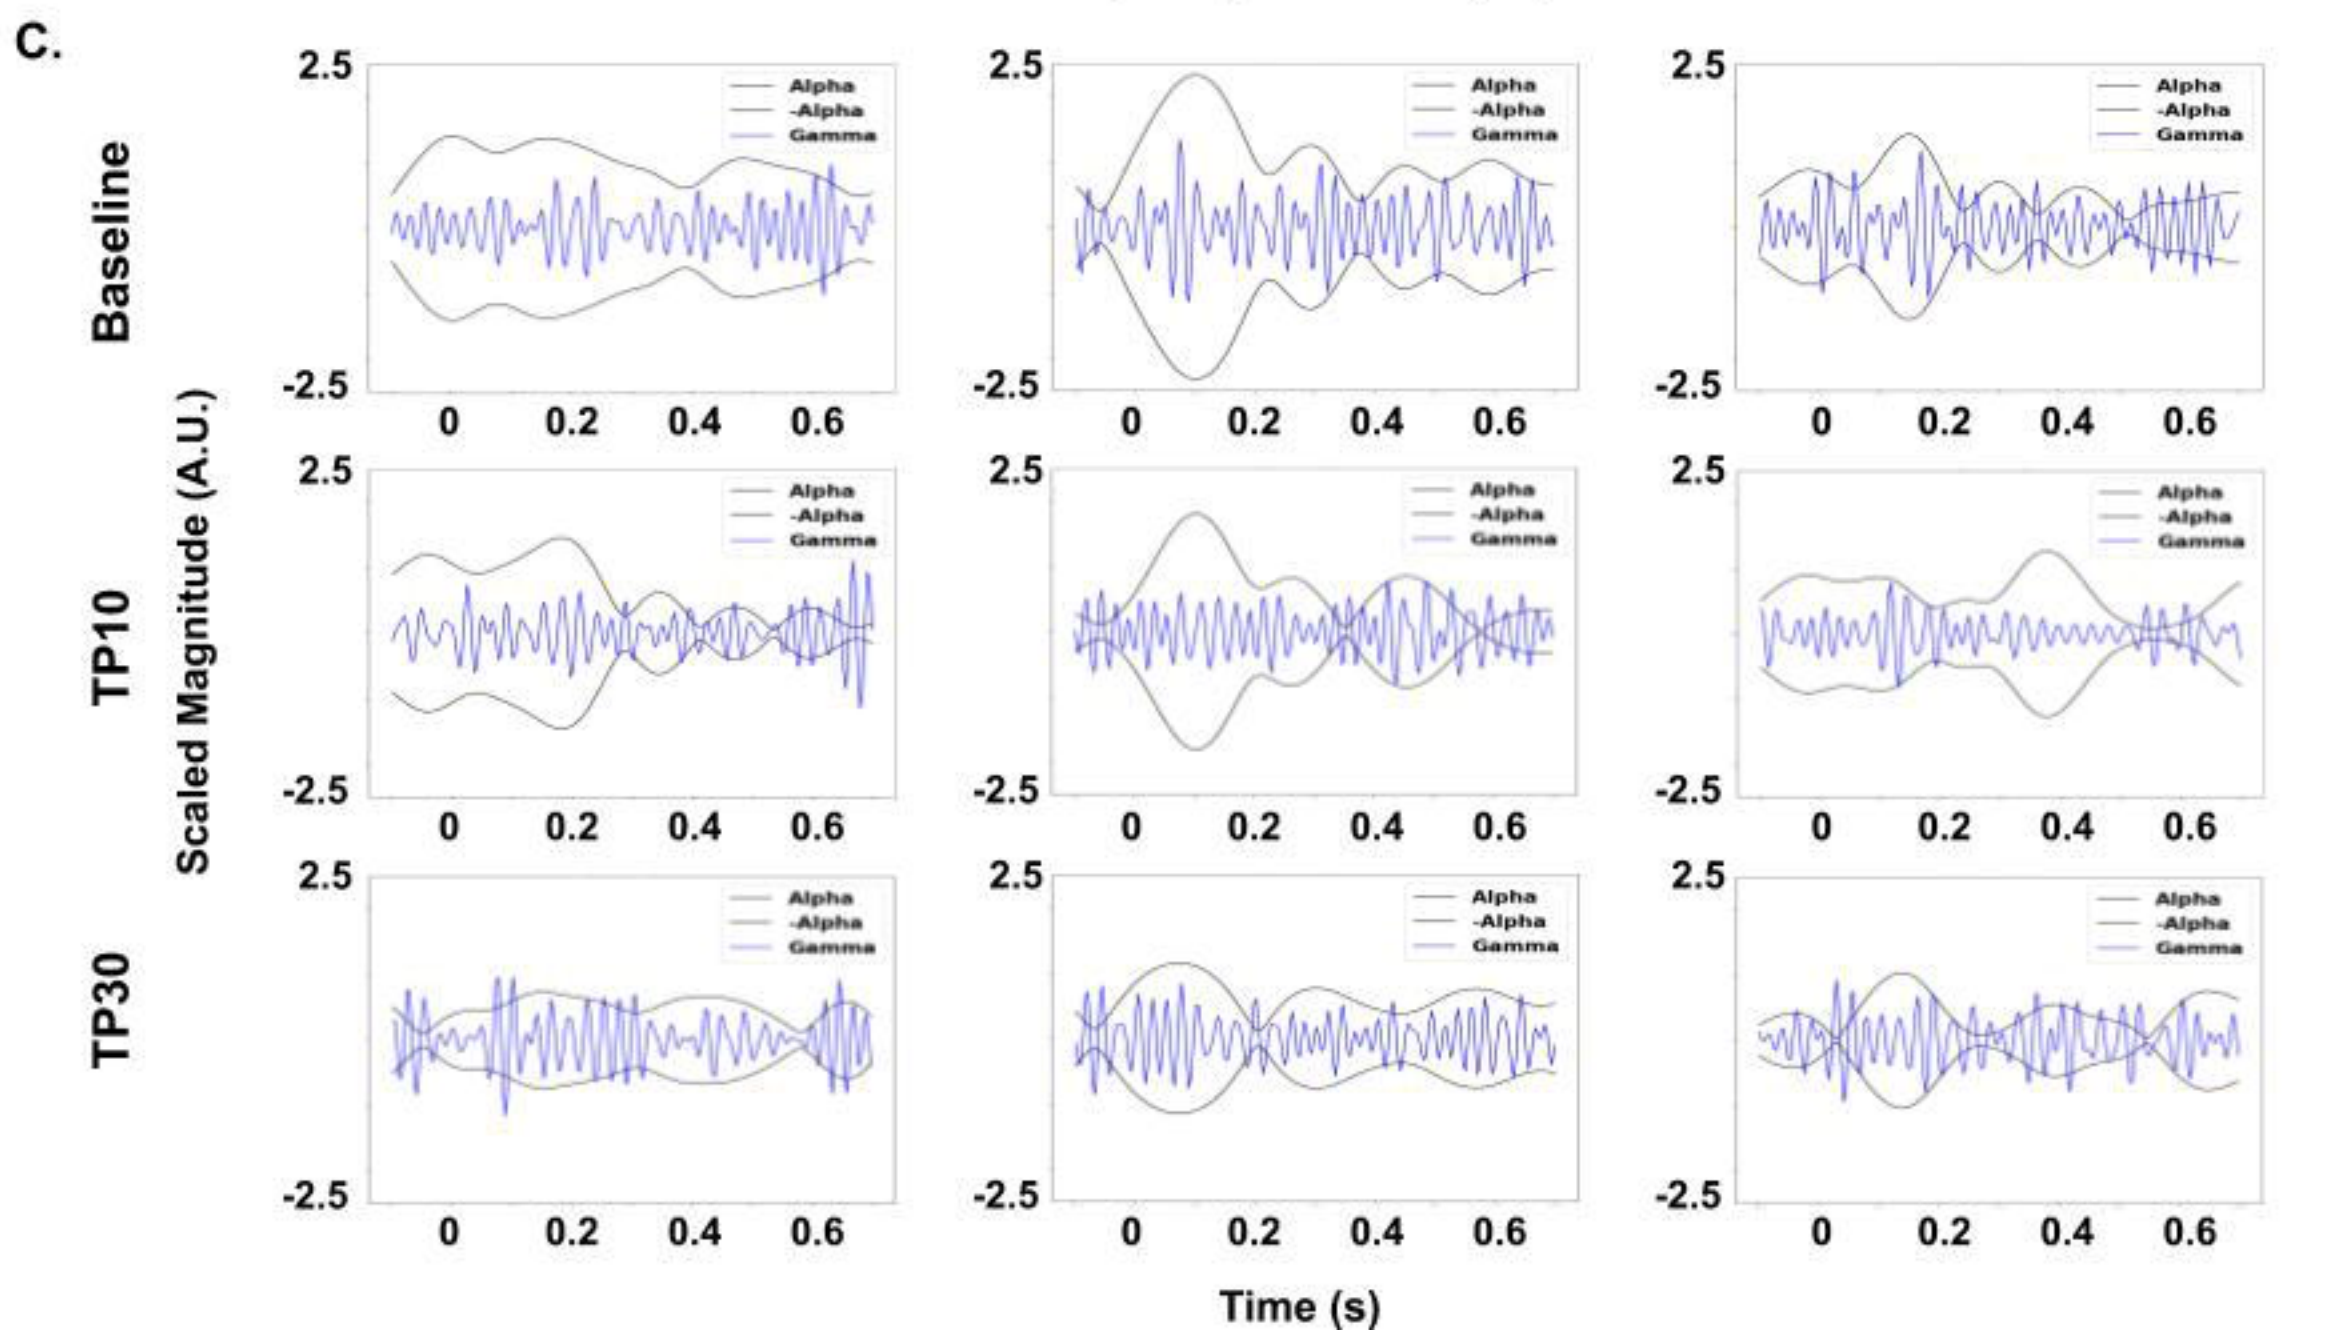



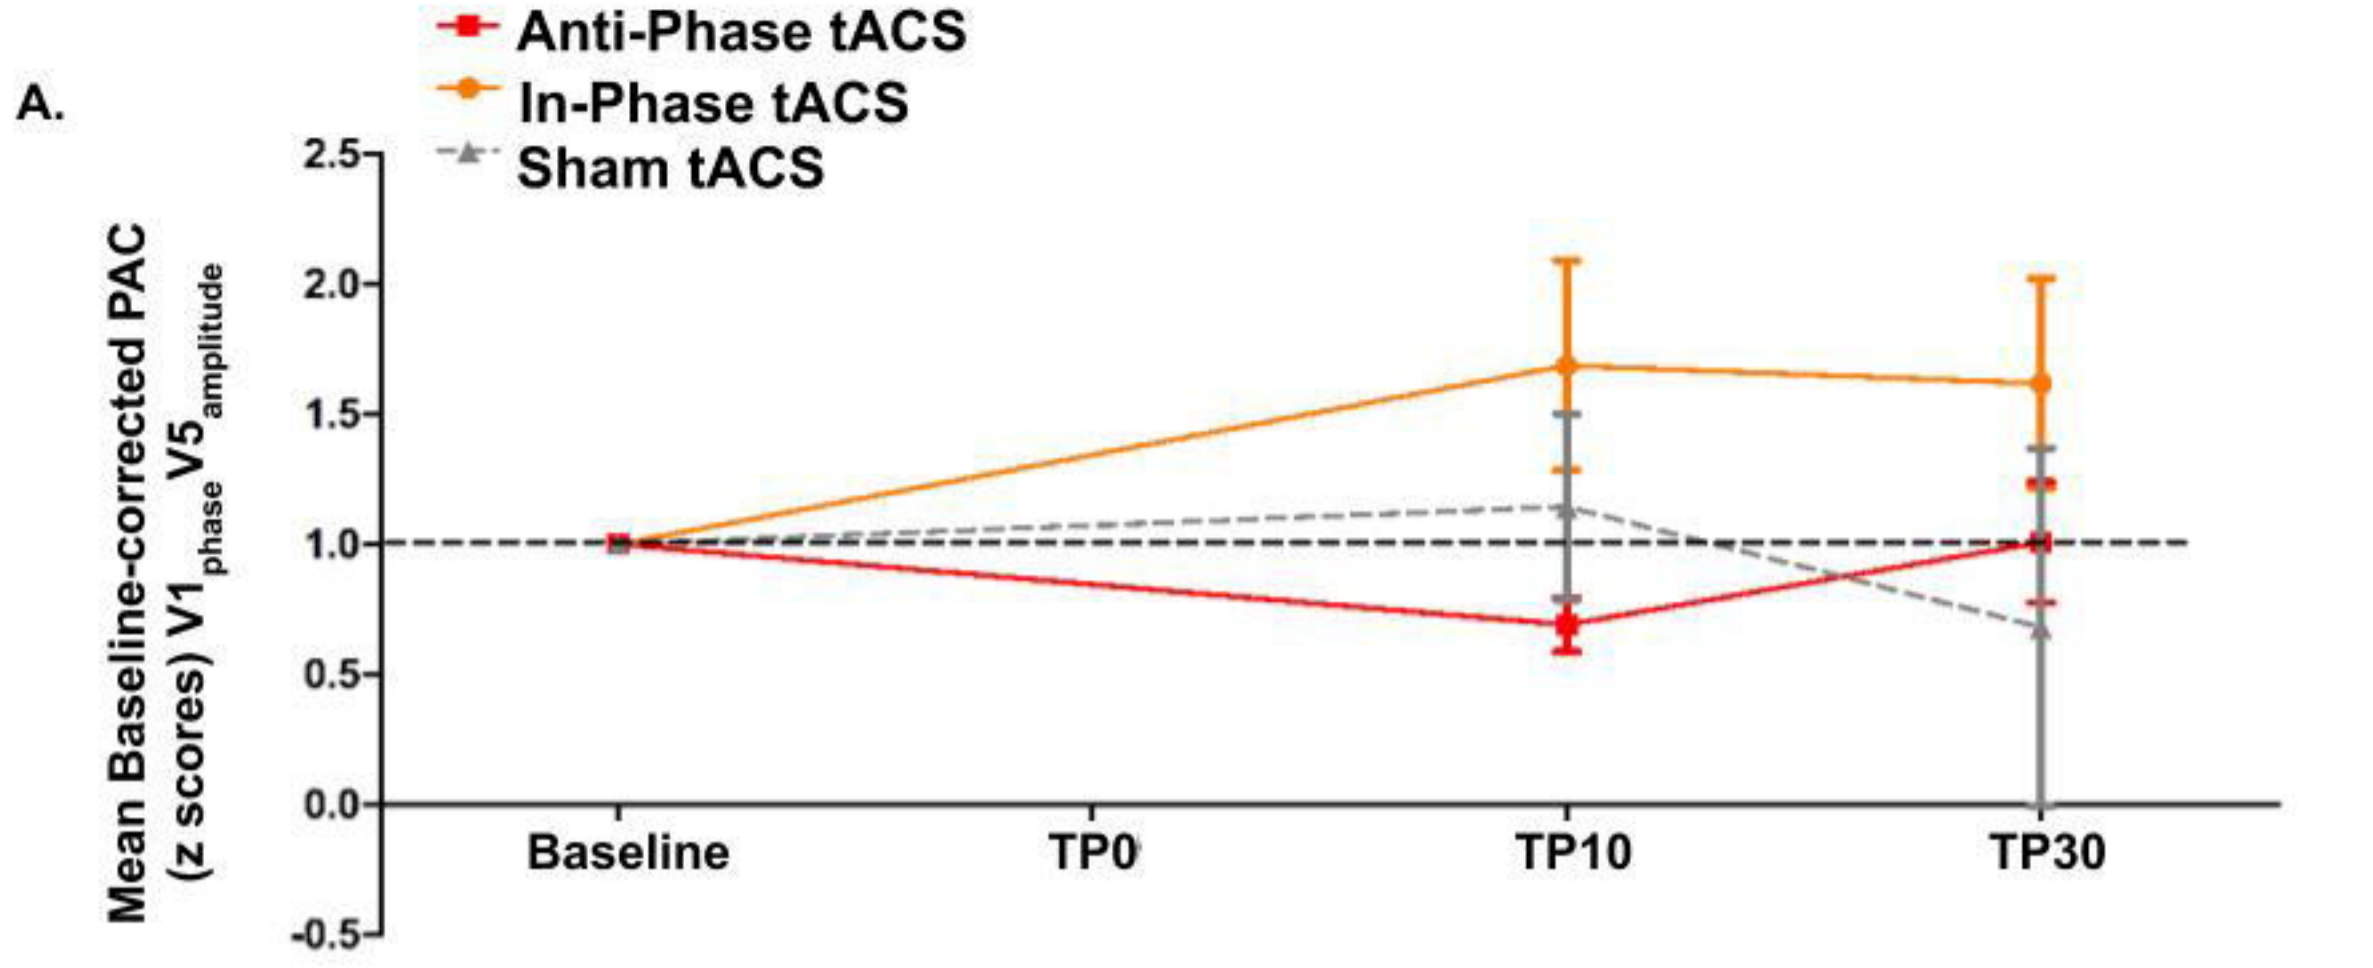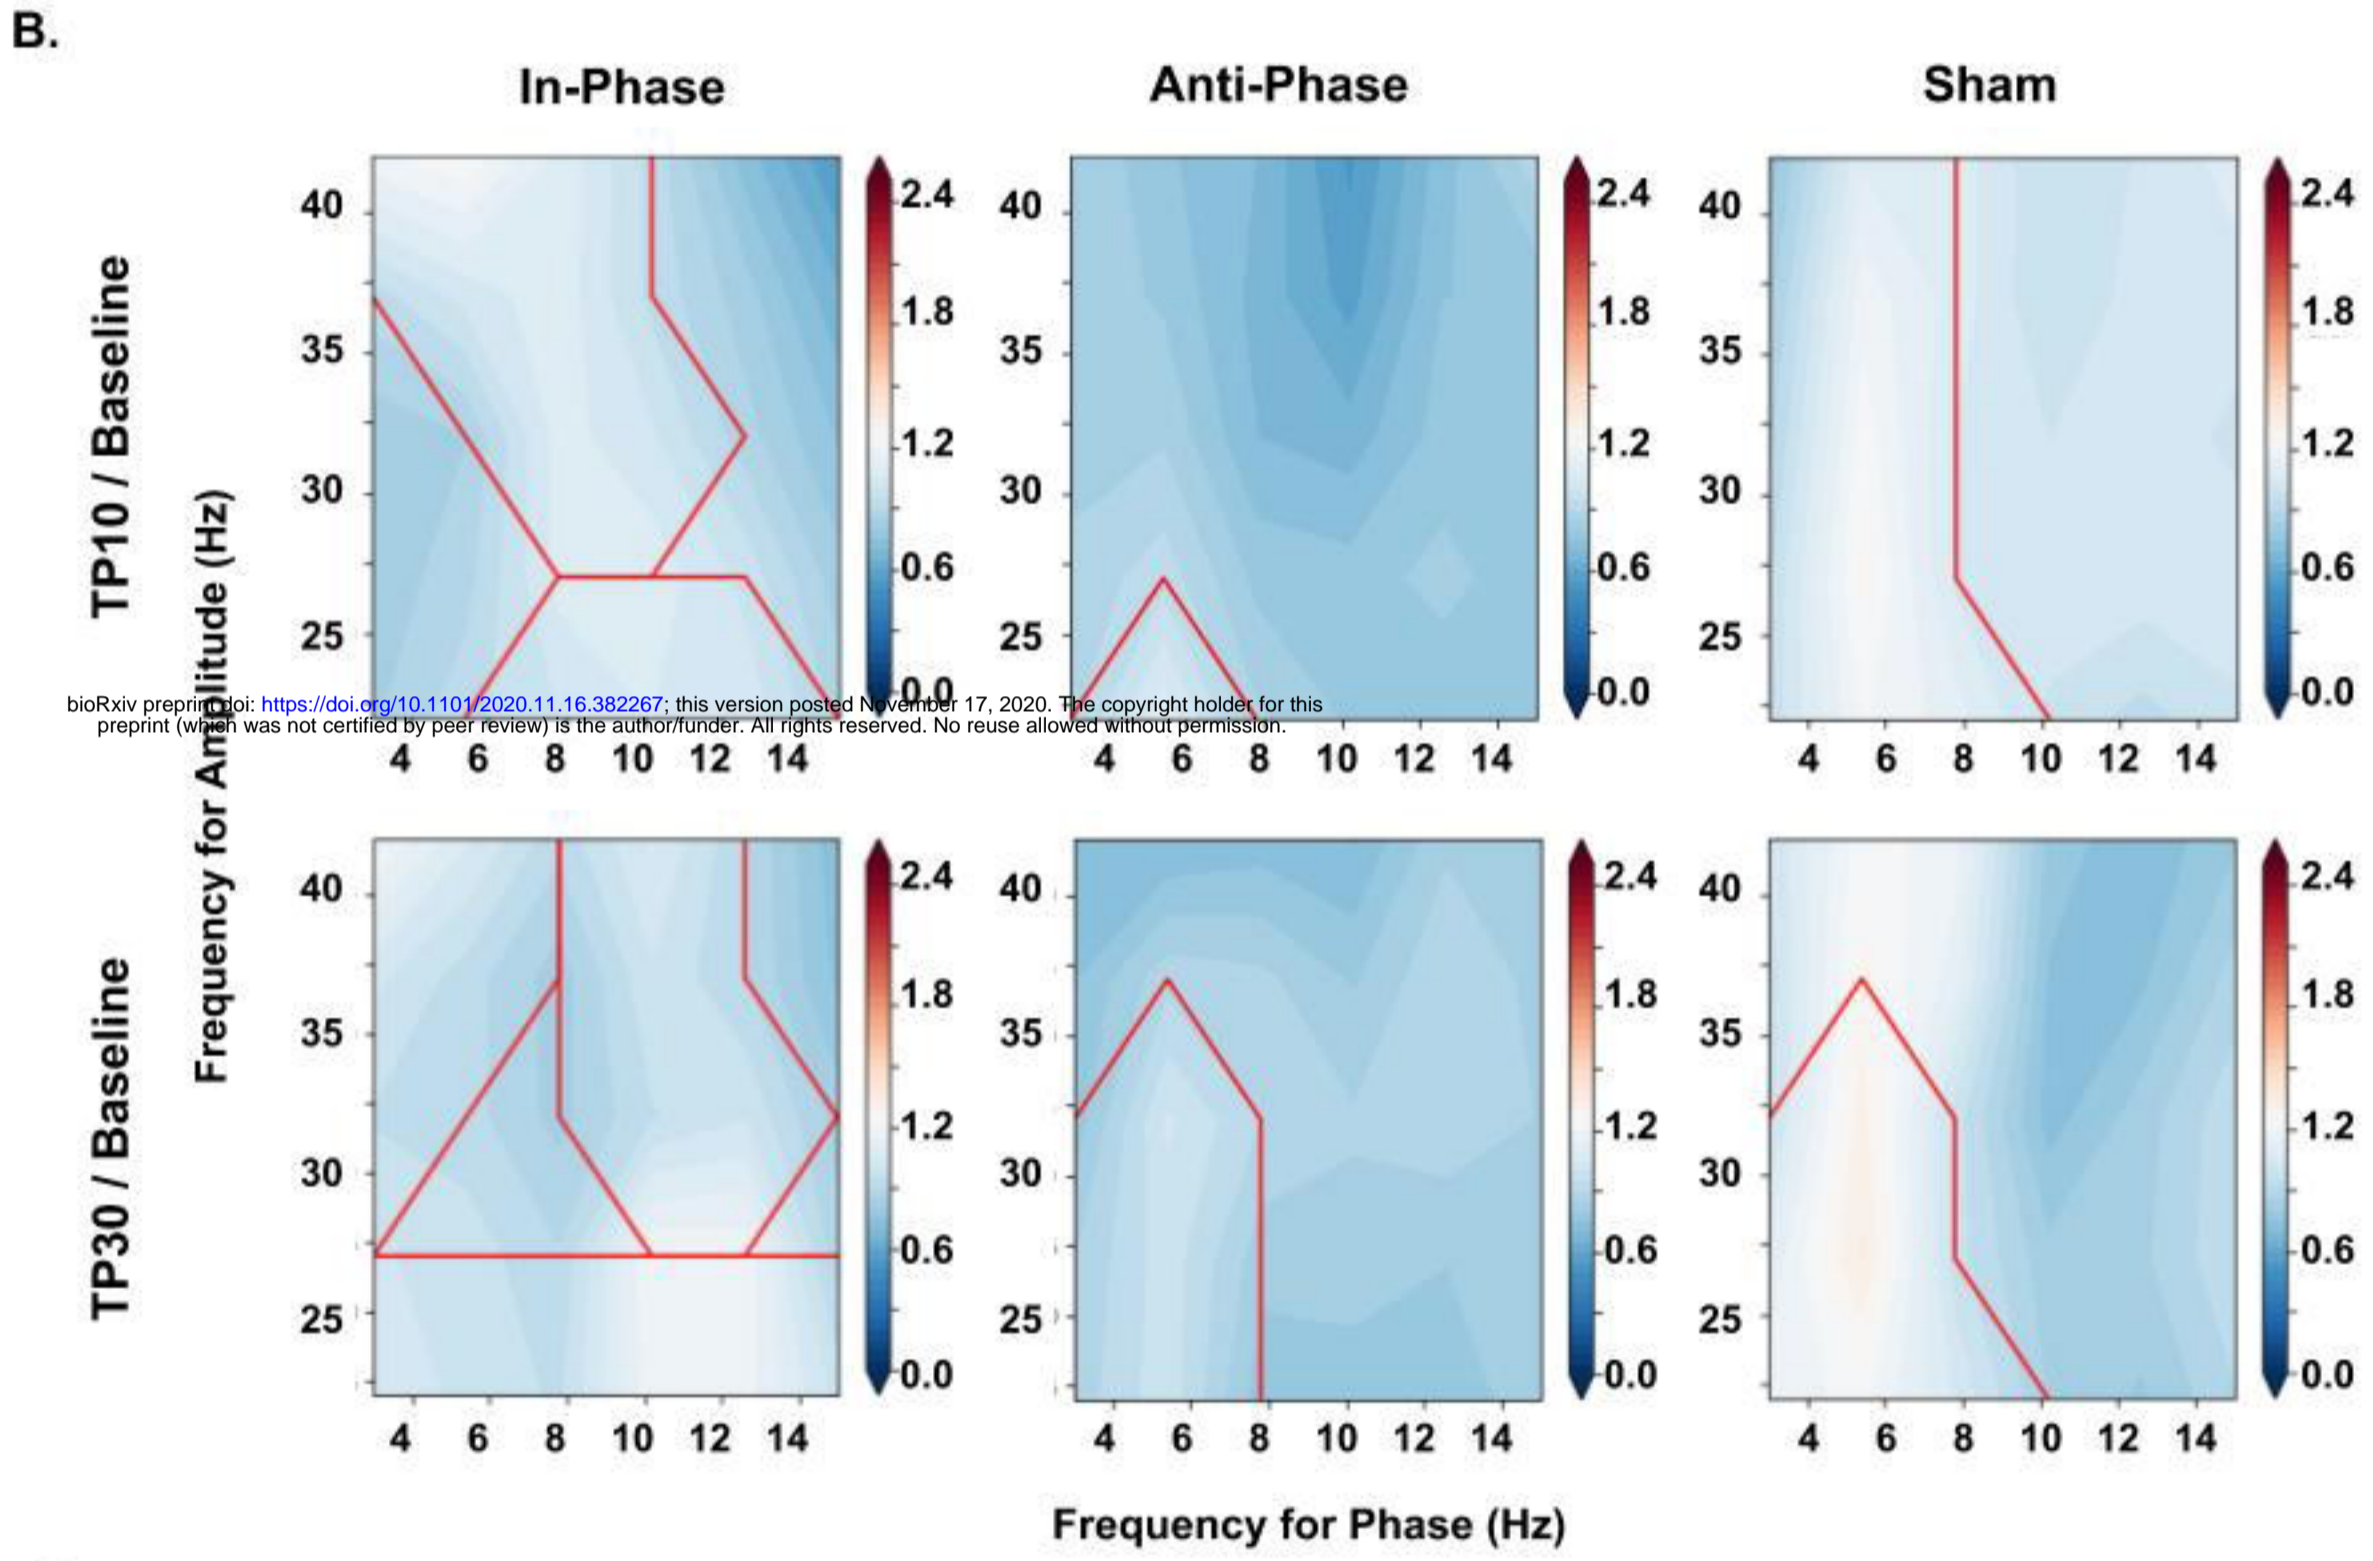

bioRxiv preprint doi: <https://doi.org/10.1101/2020.11.16.382267>; this version posted November 17, 2020. The copyright holder for this preprint (which was not certified by peer review) is the author/funder. All rights reserved. No reuse allowed without permission.

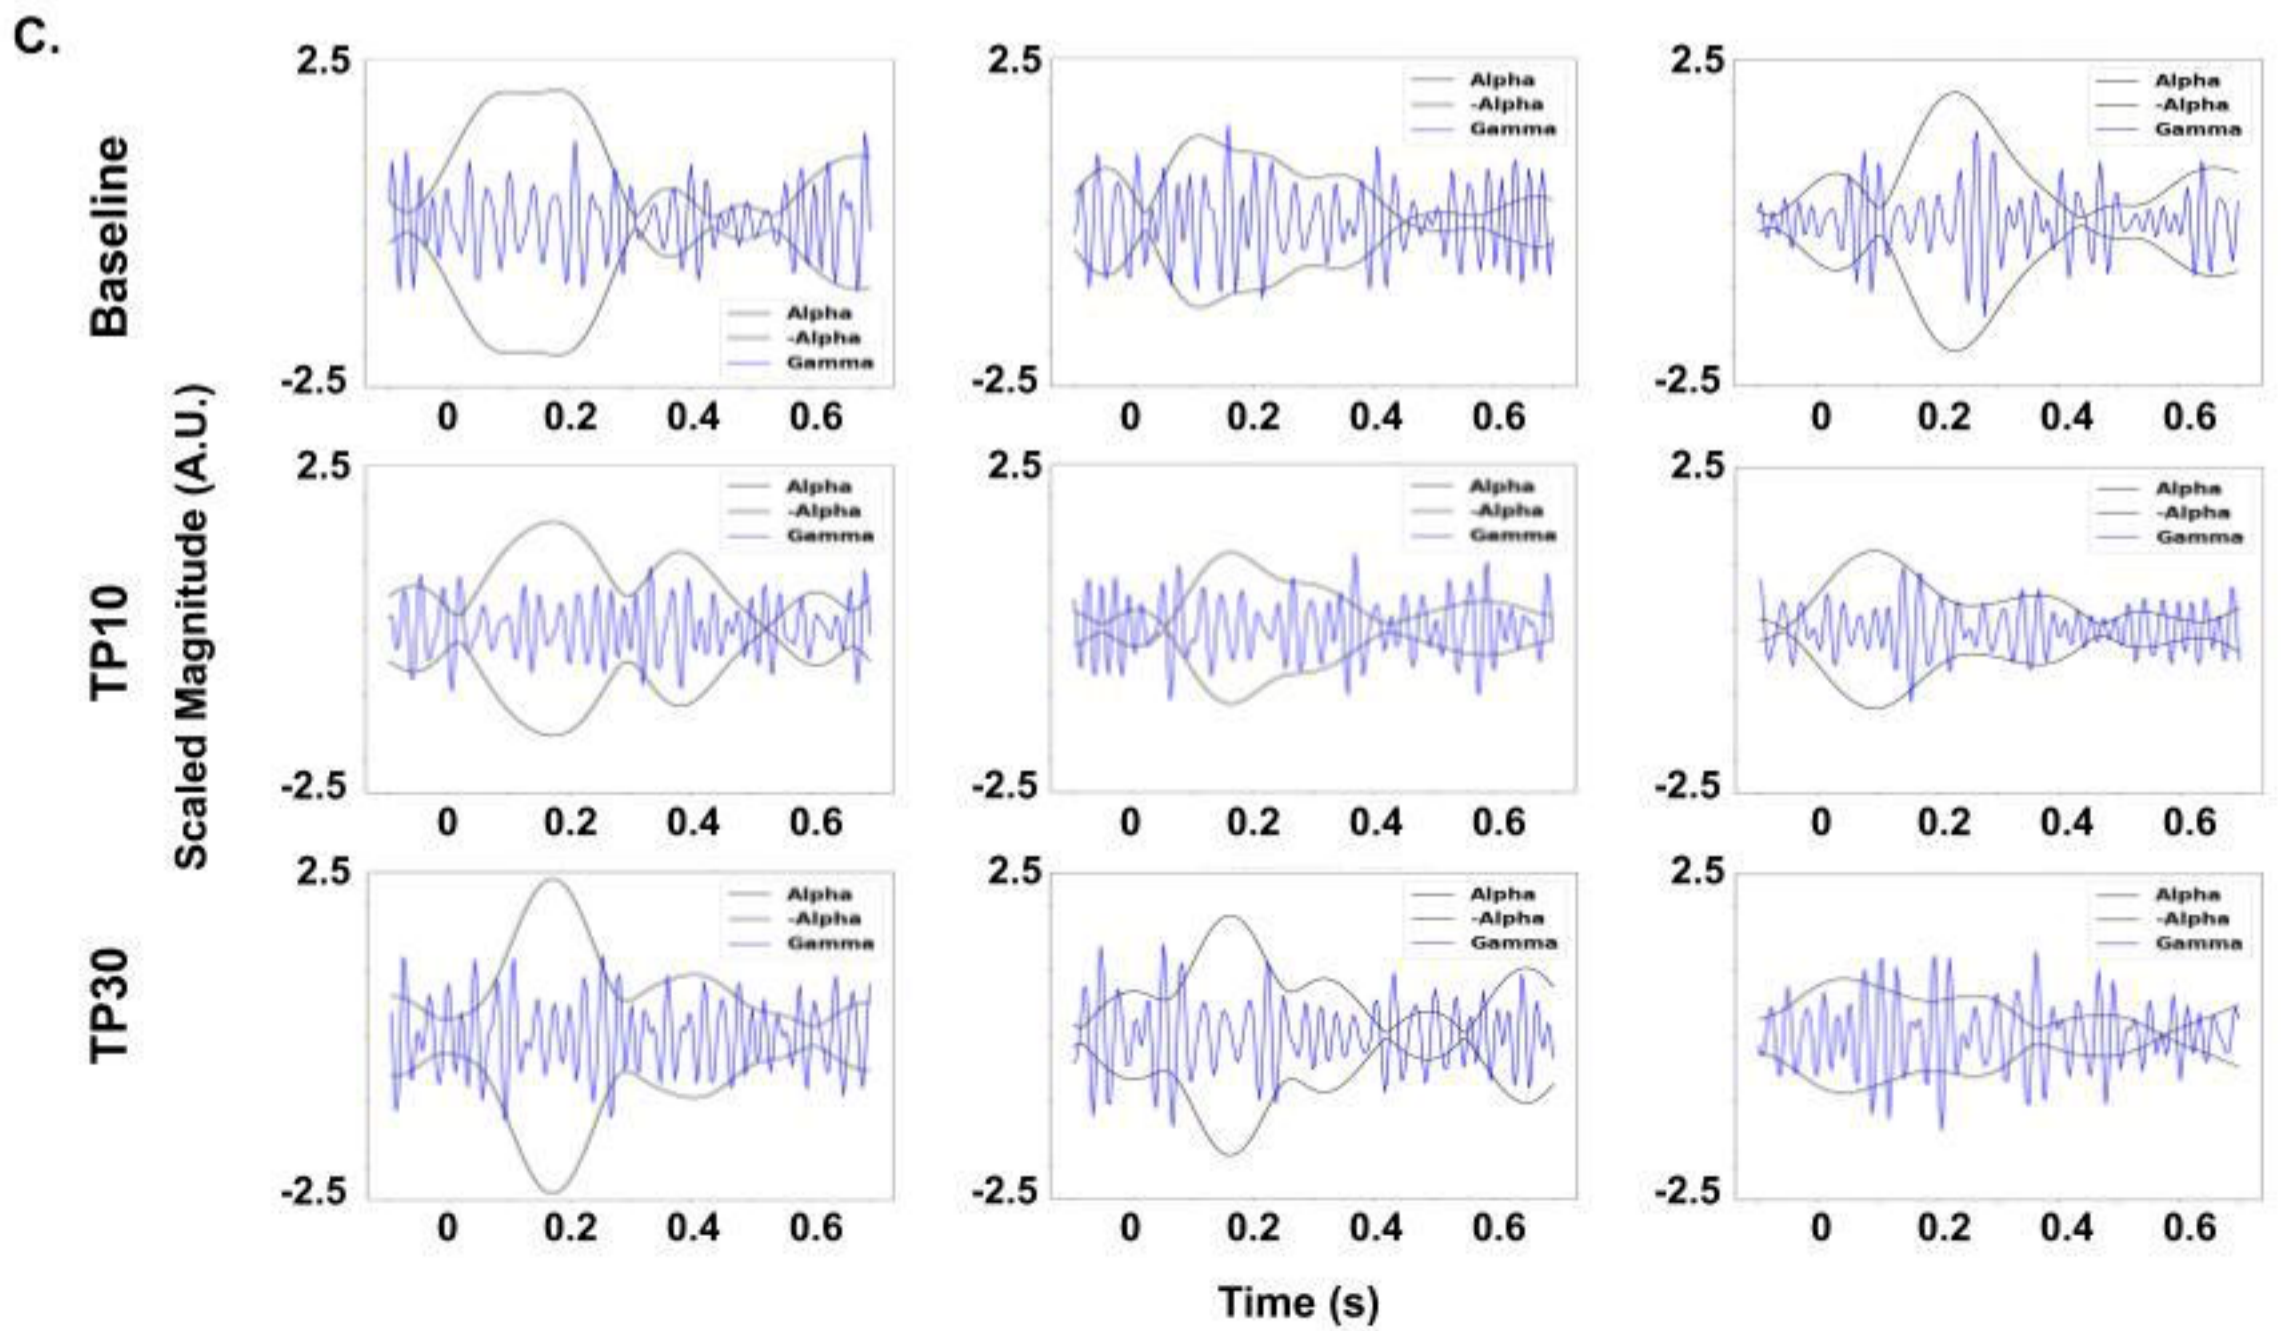

Source: https://biorxiv.org/content/10.1101/2020.11.16.382267v1.full.pdf
